# Supplementary material
Source: PubMed Central journal article supplement (PMC7612258)
Supplement: EMS140800-supplement-Supplementary_Files.pdf [file EMS140800-supplement-Supplementary_Files.pdf]

## Supplementary Material

|                    |                                                                                                                                                     |
|--------------------|-----------------------------------------------------------------------------------------------------------------------------------------------------|
| <b>Appendix 1</b>  | PRISMA checklist                                                                                                                                    |
| <b>Appendix 2</b>  | MOOSE checklist                                                                                                                                     |
| <b>Appendix 3</b>  | Data sources and search strategy, eligibility criteria, and data extraction and quality assessment methods                                          |
| <b>Appendix 4</b>  | Literature search strategy                                                                                                                          |
| <b>Appendix 5</b>  | Statistical analyses                                                                                                                                |
| <b>Appendix 6</b>  | Reference list of 149 included articles                                                                                                             |
| <b>Appendix 7</b>  | Characteristics of studies included in review                                                                                                       |
| <b>Appendix 8</b>  | Cochrane risk of bias assessment for randomised controlled trials                                                                                   |
| <b>Appendix 9</b>  | Incidence rate of dislocation across 112 relevant studies                                                                                           |
| <b>Appendix 10</b> | Incidence of dislocation following primary total hip replacement at specific average follow-up periods                                              |
| <b>Appendix 11</b> | Risk of dislocation comparing males to females                                                                                                      |
| <b>Appendix 12</b> | Risk of dislocation comparing males to females, grouped according to study level characteristics                                                    |
| <b>Appendix 13</b> | Risk of dislocation for BMI comparisons                                                                                                             |
| <b>Appendix 14</b> | Risk of dislocation comparing individuals with a BMI $\geq 30$ versus $< 30$ kg/m <sup>2</sup> , grouped according to several study characteristics |
| <b>Appendix 15</b> | Risk of dislocation comparing patients with neurological disease versus no neurological disease                                                     |
| <b>Appendix 16</b> | Risk of dislocation comparing a surgical indication of avascular necrosis versus osteoarthritis                                                     |
| <b>Appendix 17</b> | Risk of dislocation comparing a surgical indication of rheumatoid arthritis versus osteoarthritis                                                   |
| <b>Appendix 18</b> | Risk of dislocation comparing a surgical indication of avascular necrosis versus osteoarthritis, grouped according to study level characteristics   |
| <b>Appendix 19</b> | Risk of dislocation comparing a posterior with an anterolateral approach                                                                            |
| <b>Appendix 20</b> | Risk of dislocation comparing a direct anterior with a posterior approach                                                                           |
| <b>Appendix 21</b> | Risk of dislocation comparing a posterior with an anterolateral approach, grouped according to study level characteristics                          |
| <b>Appendix 22</b> | Summary associations of surgery-related factors and risk of dislocation                                                                             |
| <b>Appendix 23</b> | Risk of dislocation comparing a posterior short external rotator and capsule repair versus none                                                     |
| <b>Appendix 24</b> | Risk of dislocation comparing a posterior short external rotator and capsule repair versus none, grouped according to study level characteristics   |
| <b>Appendix 25</b> | Summary associations of implant-related factors and risk of dislocation                                                                             |
| <b>Appendix 26</b> | Risk of dislocation comparing femoral head diameter 28mm versus 32mm                                                                                |
| <b>Appendix 27</b> | Risk of dislocation comparing femoral head diameter 28mm versus 32mm, grouped according to study level characteristics                              |
| <b>Appendix 28</b> | Summary associations of hospital-related factors and risk of dislocation                                                                            |
| <b>Appendix 29</b> | Hospital-related factors and risk of dislocation                                                                                                    |
| <b>Appendix 30</b> | Assessment of small study effects by funnel plots and Egger's regression symmetry tests                                                             |

## Appendix 1. PRISMA checklist

| Section/topic                      | Item No | Checklist item                                                                                                                                                                                                                                                                                         | Reported on page No                                      |
|------------------------------------|---------|--------------------------------------------------------------------------------------------------------------------------------------------------------------------------------------------------------------------------------------------------------------------------------------------------------|----------------------------------------------------------|
| <b>Title</b>                       |         |                                                                                                                                                                                                                                                                                                        |                                                          |
| Title                              | 1       | Identify the report as a systematic review, meta-analysis, or both                                                                                                                                                                                                                                     | 1                                                        |
| <b>Abstract</b>                    |         |                                                                                                                                                                                                                                                                                                        |                                                          |
| Structured summary                 | 2       | Provide a structured summary including, as applicable, background, objectives, data sources, study eligibility criteria, participants, interventions, study appraisal and synthesis methods, results, limitations, conclusions and implications of key findings, systematic review registration number | 2                                                        |
| <b>Introduction</b>                |         |                                                                                                                                                                                                                                                                                                        |                                                          |
| Rationale                          | 3       | Describe the rationale for the review in the context of what is already known                                                                                                                                                                                                                          | Introduction                                             |
| Objectives                         | 4       | Provide an explicit statement of questions being addressed with reference to participants, interventions, comparisons, outcomes, and study design (PICOS)                                                                                                                                              | Introduction                                             |
| <b>Methods</b>                     |         |                                                                                                                                                                                                                                                                                                        |                                                          |
| Protocol and registration          | 5       | Indicate if a review protocol exists, if and where it can be accessed (such as web address), and, if available, provide registration information including registration number                                                                                                                         | Methods                                                  |
| Eligibility criteria               | 6       | Specify study characteristics (such as PICOS, length of follow-up) and report characteristics (such as years considered, language, publication status) used as criteria for eligibility, giving rationale                                                                                              | Methods                                                  |
| Information sources                | 7       | Describe all information sources (such as databases with dates of coverage, contact with study authors to identify additional studies) in the search and date last searched                                                                                                                            | Methods                                                  |
| Search                             | 8       | Present full electronic search strategy for at least one database, including any limits used, such that it could be repeated                                                                                                                                                                           | Appendix 4                                               |
| Study selection                    | 9       | State the process for selecting studies (that is, screening, eligibility, included in systematic review, and, if applicable, included in the meta-analysis)                                                                                                                                            | Methods                                                  |
| Data collection process            | 10      | Describe method of data extraction from reports (such as piloted forms, independently, in duplicate) and any processes for obtaining and confirming data from investigators                                                                                                                            | Methods                                                  |
| Data items                         | 11      | List and define all variables for which data were sought (such as PICOS, funding sources) and any assumptions and simplifications made                                                                                                                                                                 | Methods                                                  |
| Risk of bias in individual studies | 12      | Describe methods used for assessing risk of bias of individual studies (including specification of whether this was done at the study or outcome level), and how this information is to be used in any data synthesis                                                                                  | Methods                                                  |
| Summary measures                   | 13      | State the principal summary measures (such as risk ratio, difference in means).                                                                                                                                                                                                                        | Methods                                                  |
| Synthesis of results               | 14      | Describe the methods of handling data and combining results of studies, if done, including measures of consistency (such as I <sup>2</sup> statistic) for each meta-analysis                                                                                                                           | Methods                                                  |
| Risk of bias across studies        | 15      | Specify any assessment of risk of bias that may affect the cumulative evidence (such as publication bias, selective reporting within studies)                                                                                                                                                          | Methods                                                  |
| Additional analyses                | 16      | Describe methods of additional analyses (such as sensitivity or subgroup analyses, meta-regression), if done, indicating which were pre-specified                                                                                                                                                      | Methods                                                  |
| <b>Results</b>                     |         |                                                                                                                                                                                                                                                                                                        |                                                          |
| Study selection                    | 17      | Give numbers of studies screened, assessed for eligibility, and included in the review, with reasons for exclusions at each stage, ideally with a flow diagram                                                                                                                                         | Results, Figure 1                                        |
| Study characteristics              | 18      | For each study, present characteristics for which data were extracted (such as study size, PICOS, follow-up period) and provide the citations                                                                                                                                                          | Results, Table 1, Appendices 6-7                         |
| Risk of bias within studies        | 19      | Present data on risk of bias of each study and, if available, any outcome-level assessment (see item 12).                                                                                                                                                                                              | Results, Appendices 7-8                                  |
| Results of individual studies      | 20      | For all outcomes considered (benefits or harms), present for each study (a) simple summary data for each intervention group and (b) effect estimates and confidence intervals, ideally with a forest plot                                                                                              | Results, Figures 2-4                                     |
| Synthesis of results               | 21      | Present results of each meta-analysis done, including confidence intervals and measures of consistency                                                                                                                                                                                                 | Results, Figures 2-4; Appendices 9-30                    |
| Risk of bias across studies        | 22      | Present results of any assessment of risk of bias across studies (see item 15)                                                                                                                                                                                                                         | Appendices 12, 14, 18, 21, 24, 27, 30                    |
| Additional analysis                | 23      | Give results of additional analyses, if done (such as sensitivity or subgroup analyses, meta-regression) (see item 16)                                                                                                                                                                                 | Results, Figure 1, Appendices 12, 14, 18, 21, 24, 27, 30 |
| <b>Discussion</b>                  |         |                                                                                                                                                                                                                                                                                                        |                                                          |
| Summary of evidence                | 24      | Summarise the main findings including the strength of evidence for each main outcome; consider their relevance to key groups (such as health care providers, users, and policy makers)                                                                                                                 | Discussion                                               |
| Limitations                        | 25      | Discuss limitations at study and outcome level (such as risk of bias), and at review level (such as incomplete retrieval of identified research, reporting bias)                                                                                                                                       | Discussion                                               |
| Conclusions                        | 26      | Provide a general interpretation of the results in the context of other evidence, and implications for future research                                                                                                                                                                                 | Discussion                                               |
| <b>Funding</b>                     |         |                                                                                                                                                                                                                                                                                                        |                                                          |
| Funding                            | 27      | Describe sources of funding for the systematic review and other support (such as supply of data) and role of funders for the systematic review                                                                                                                                                         | Acknowledgements                                         |

## Appendix 2. MOOSE checklist

### Risk factors for dislocation after primary total hip replacement: meta-analysis of 125 studies involving approximately five million hip replacements

| Criteria                                           |                                                                                                                                            | Brief description of how the criteria were handled in the review                                                                                                                                                                                                                                                                                                                |
|----------------------------------------------------|--------------------------------------------------------------------------------------------------------------------------------------------|---------------------------------------------------------------------------------------------------------------------------------------------------------------------------------------------------------------------------------------------------------------------------------------------------------------------------------------------------------------------------------|
| <b>Reporting of background</b>                     |                                                                                                                                            |                                                                                                                                                                                                                                                                                                                                                                                 |
| √                                                  | Problem definition                                                                                                                         | Factors influencing dislocation following primary total hip replacement (THR) are not well understood. We conducted a systematic review and meta-analysis to assess the associations of patient-, surgery-, implant-, and hospital-related factors with dislocation risk following primary THR                                                                                  |
| √                                                  | Hypothesis statement                                                                                                                       | Several patient-, surgery-, implant-, and hospital-related factors influence the risk of dislocation following primary THR                                                                                                                                                                                                                                                      |
| √                                                  | Description of study outcomes                                                                                                              | Dislocation                                                                                                                                                                                                                                                                                                                                                                     |
| √                                                  | Type of exposure                                                                                                                           | Patient-, surgery-, implant-, and hospital-related factors                                                                                                                                                                                                                                                                                                                      |
| √                                                  | Type of study designs used                                                                                                                 | Longitudinal studies (prospective or retrospective case control, prospective cohort, retrospective cohort, case-cohort, nested-case control, or clinical trials)                                                                                                                                                                                                                |
| √                                                  | Study population                                                                                                                           | Patients followed for dislocation following primary THR                                                                                                                                                                                                                                                                                                                         |
| <b>Reporting of search strategy should include</b> |                                                                                                                                            |                                                                                                                                                                                                                                                                                                                                                                                 |
| √                                                  | Qualifications of searchers                                                                                                                |                                                                                                                                                                                                                                                                                                                                                                                 |
| √                                                  | Search strategy, including time period included in the synthesis and keywords                                                              | Time period: from inception to March 8, 2019<br>The detailed search strategy can be found in Appendix 3                                                                                                                                                                                                                                                                         |
| √                                                  | Databases and registries searched                                                                                                          | MEDLINE, EMBASE, Web of Science, and Cochrane databases                                                                                                                                                                                                                                                                                                                         |
| √                                                  | Search software used, name and version, including special features                                                                         | OvidSP was used to search EMBASE and MEDLINE<br>EndNote used to manage references                                                                                                                                                                                                                                                                                               |
| √                                                  | Use of hand searching                                                                                                                      | We searched bibliographies of retrieved papers                                                                                                                                                                                                                                                                                                                                  |
| √                                                  | List of citations located and those excluded, including justifications                                                                     | Details of the literature search process are outlined in the flow chart. The citation list for excluded studies are available on request.                                                                                                                                                                                                                                       |
| √                                                  | Method of addressing articles published in languages other than English                                                                    | Not applicable                                                                                                                                                                                                                                                                                                                                                                  |
| √                                                  | Method of handling abstracts and unpublished studies                                                                                       | Abstracts with no full text publications were not included.                                                                                                                                                                                                                                                                                                                     |
| √                                                  | Description of any contact with authors                                                                                                    | We contacted authors of studies that did not provide adequate data in their studies                                                                                                                                                                                                                                                                                             |
| <b>Reporting of methods should include</b>         |                                                                                                                                            |                                                                                                                                                                                                                                                                                                                                                                                 |
| √                                                  | Description of relevance or appropriateness of studies assembled for assessing the hypothesis to be tested                                 | Detailed inclusion and exclusion criteria are described in the Methods section.                                                                                                                                                                                                                                                                                                 |
| √                                                  | Rationale for the selection and coding of data                                                                                             | Data extracted from each of the studies were relevant to the population characteristics, study design, exposure, and outcome.                                                                                                                                                                                                                                                   |
| √                                                  | Assessment of confounding                                                                                                                  | We assessed confounding by ranking individual studies on the basis of different adjustment levels and performed sub-group analyses to evaluate differences in the overall estimates according to levels of adjustment.                                                                                                                                                          |
| √                                                  | Assessment of study quality, including blinding of quality assessors; stratification or regression on possible predictors of study results | Study quality was assessed based on the nine-star Newcastle–Ottawa Scale using pre-defined criteria namely: population representativeness, comparability (adjustment of confounders), ascertainment of outcome. Sensitivity analyses by several quality indicators such as study size, duration of follow-up, and adjustment factors. Cochrane risk of bias for clinical trials |
| √                                                  | Assessment of heterogeneity                                                                                                                | Heterogeneity of the studies was quantified with $I^2$ statistic that provides the relative amount of variance of the summary effect due to the between-study heterogeneity and explored using meta-regression and stratified analyses                                                                                                                                          |
| √                                                  | Description of statistical methods in sufficient detail to be replicated                                                                   | Description of methods of meta-analyses, sensitivity analyses, meta-regression and assessment of publication bias are detailed in the methods. We performed random effects meta-analysis with Stata 15.                                                                                                                                                                         |
| √                                                  | Provision of appropriate tables and graphics                                                                                               | Table 1; Figures 1-4; Appendices 9-30                                                                                                                                                                                                                                                                                                                                           |
| <b>Reporting of results should include</b>         |                                                                                                                                            |                                                                                                                                                                                                                                                                                                                                                                                 |
| √                                                  | Graph summarizing individual study estimates and overall estimate                                                                          | Figures 1-4; Appendices 9-30                                                                                                                                                                                                                                                                                                                                                    |
| √                                                  | Table giving descriptive information for each study included                                                                               | Appendix 7                                                                                                                                                                                                                                                                                                                                                                      |

|                                                |                                                                |                                                                                                                                                                                                                                                                                   |
|------------------------------------------------|----------------------------------------------------------------|-----------------------------------------------------------------------------------------------------------------------------------------------------------------------------------------------------------------------------------------------------------------------------------|
| √                                              | Results of sensitivity testing                                 | Sensitivity analysis was conducted to assess the influence of some large studies and low quality studies on the pooled estimate.                                                                                                                                                  |
| √                                              | Indication of statistical uncertainty of findings              | 95% confidence intervals were presented with all summary estimates, I <sup>2</sup> values and results of sensitivity analyses                                                                                                                                                     |
| <b>Reporting of discussion should include</b>  |                                                                |                                                                                                                                                                                                                                                                                   |
| √                                              | Quantitative assessment of bias                                | Sensitivity analyses indicate heterogeneity in strengths of the association due to most common biases in observational studies. The systematic review is limited in scope, as it involves published data. Individual participant data is needed. Limitations have been discussed. |
| √                                              | Justification for exclusion                                    | All studies were excluded based on the pre-defined inclusion criteria in methods section.                                                                                                                                                                                         |
| √                                              | Assessment of quality of included studies                      | Brief discussion included in 'Methods' section                                                                                                                                                                                                                                    |
| <b>Reporting of conclusions should include</b> |                                                                |                                                                                                                                                                                                                                                                                   |
| √                                              | Consideration of alternative explanations for observed results | Discussion                                                                                                                                                                                                                                                                        |
| √                                              | Generalization of the conclusions                              | Discussed in the context of the results.                                                                                                                                                                                                                                          |
| √                                              | Guidelines for future research                                 | We recommend analyses of individual participant data                                                                                                                                                                                                                              |
| √                                              | Disclosure of funding source                                   | In "Acknowledgement" section                                                                                                                                                                                                                                                      |

### **Appendix 3. Data sources and search strategy, eligibility criteria, and data extraction and quality assessment methods**

#### **Data sources and search strategy**

We systematically conducted an electronic search of MEDLINE, Embase, Web of Science and The Cochrane library from inception of these databases to March 8, 2019. The search strategy was constructed by combining MeSH search terms and key words related to the population (e.g., “primary total hip replacement”), exposures (e.g., “age”, “sex”, “risk factor”), and outcome (e.g., “dislocation”, “instability”). The search was restricted to human studies with no limits on language. The full details of the MEDLINE search strategy are reported in appendix pp 7-8. All titles and abstracts of studies retrieved from the databases were screened by one reviewer (SKK) to assess their suitability for inclusion, after which full texts of potentially eligible papers were acquired. Full text evaluation was then conducted by two independent reviewers (SKK and MCB) based on the eligibility criteria. Disagreements regarding eligibility of articles were discussed and the opinion of a third reviewer (MRW) was sought when necessary to achieve consensus. The “cited by” function in Web of Science and the reference lists of relevant studies and review articles were assessed to identify any additional papers.

#### **Eligibility criteria**

Papers were eligible if they were longitudinal studies (prospective or retrospective cohorts, case-cohorts, nested-case controls, or clinical trials) that recruited patients who had undergone primary THR and reported on the associations of any patient-, surgery-, implant- or hospital-related factor (assessed at baseline or at time of surgery) with the risk of dislocation. Since more than 50% of dislocations occur in the first three months following THR<sup>1,2</sup> and about a third manifest as late dislocations more than 5 years postoperatively,<sup>3</sup> no restrictions were placed on the duration of follow-up. We excluded studies: (i) restricted to selected populations or patients with prevalent comorbidities (e.g. diabetes) and had no comparison or control groups; (ii) of revision THRs; (iii) that exclusively assessed risk factors for recurrent dislocation; (iv) that evaluated exposures (conditions) that developed post-surgery; (v) that involved only particular indications for THR such as hip fracture; and (vi) that included only hemiarthroplasty or hip resurfacing.

#### **Data extraction and quality assessment**

One reviewer (SKK) independently extracted qualitative and quantitative information into a standardised data collection spreadsheet. Data was extracted on study design, patient characteristics, type of exposures, and outcomes. A second reviewer (MCB) then independently checked the extracted data with that in the original papers. Any disagreements on extracted information between the two reviewers (SKK and MCB) were discussed and a third reviewer (MRW) was involved to achieve consensus. Authors were contacted to provide additional information if there was insufficient data (e.g. data for estimating a risk

ratio) reported. When the same study was described in multiple publications, the paper with the most comprehensive information was used. Methodological quality of each eligible study was assessed using the nine-star Newcastle-Ottawa Scale (NOS).<sup>4</sup> NOS measures the quality of evidence from a score of zero to nine, based on three pre-defined domains including: (i) selection of participants; (ii) comparability; and (iii) ascertainment of outcomes of interest. The Cochrane Collaboration's risk of bias tool was used to assess the quality of randomised controlled trials (RCTs).<sup>5</sup>

## References

1. Woo RY, Morrey BF. Dislocations after total hip arthroplasty. *J Bone Joint Surg Am* 1982; **64**(9): 1295-306.
2. Tamaki T, Oinuma K, Miura Y, Higashi H, Kaneyama R, Shiratsuchi H. Epidemiology of Dislocation Following Direct Anterior Total Hip Arthroplasty: A Minimum 5-Year Follow-Up Study. *J Arthroplasty* 2016; **31**(12): 2886-8.
3. von Knoch M, Berry DJ, Harmsen WS, Morrey BF. Late dislocation after total hip arthroplasty. *J Bone Joint Surg Am* 2002; **84**(11): 1949-53.
4. Wells GA, Shea B, O'Connell D, et al. The Newcastle-Ottawa Scale (NOS) for assessing the quality of nonrandomised studies in meta-analyses. 2011. [www.ohri.ca/programs/clinical\\_epidemiology/oxford.asp](http://www.ohri.ca/programs/clinical_epidemiology/oxford.asp). [http://www.ohri.ca/programs/clinical\\_epidemiology/oxford.asp](http://www.ohri.ca/programs/clinical_epidemiology/oxford.asp) (accessed 20 August).
5. Higgins JP, Altman DG, Gotzsche PC, et al. The Cochrane Collaboration's tool for assessing risk of bias in randomised trials. *BMJ* 2011; **343**: d5928.

#### Appendix 4. Literature search strategy

Relevant studies, published from inception to March 8, 2019 (date last searched), were identified through electronic searches using MEDLINE, Embase, Web of Science, and Cochrane databases with no limits on language. Electronic searches were supplemented by scanning reference lists of articles identified for all relevant studies (including review articles), by hand searching of relevant journals and by correspondence with study investigators.

- 1 exp Arthroplasty, Replacement, Hip/ (24261)
- 2 primary.mp. (1433430)
- 3 exp Risk Factors/ (757067)
- 4 predictor.mp. (165039)
- 5 exp Risk Assessment/ (241419)
- 6 age.mp. (8254398)
- 7 exp Sex/ (7618)
- 8 gender.mp. (289037)
- 9 exp Body Mass Index/ (115624)
- 10 exp Body Weight/ (434494)
- 11 exp Obesity/ (194257)
- 12 exp Femur Head/ (9055)
- 13 femoral head.mp. (13361)
- 14 exp Femur/ (52415)
- 15 bearing.mp. (163097)
- 16 exp Bone Transplantation/ (30285)
- 17 bone-grafting.mp. (9443)
- 18 exp Osteotomy/ (33222)
- 19 cup inclination.mp. (280)
- 20 cup anteversion.mp. (187)
- 21 rim liner.mp. (13)
- 22 constrained liner.mp. (72)
- 23 exp Joint Instability/ (18869)
- 24 history of instability.mp. (53)
- 25 abductor.mp. (4811)
- 26 instability.mp. (113768)
- 27 exp Osteonecrosis/ (14700)
- 28 acetabul\*.mp. (19874)
- 29 abduction.mp. (11448)
- 30 exp Smoking/ (139466)
- 31 exp Tobacco/ (29292)
- 32 alcohol.mp. (276997)
- 33 exp Socioeconomic Factors/ (422282)
- 34 socioeconomic.mp. (196851)
- 35 Diabetes Mellitus/ (111170)
- 36 diabetes.mp. (559194)
- 37 exp Hypertension/ (243676)
- 38 exp Heart Failure/ (111781)
- 39 exp Cardiovascular Diseases/ (2252580)
- 40 exp Coronary Artery Disease/ (56252)
- 41 exp Myocardial Infarction/ (167360)
- 42 exp Neoplasms/ (3140515)
- 43 malignancy.mp. (126587)

44 cancer.mp. (1525619)  
 45 exp Comorbidity/ (98296)  
 46 Charlson comorbidity index.mp. (4236)  
 47 exp Arthritis, Rheumatoid/ (107717)  
 48 exp Osteoarthritis/ (57822)  
 49 exp Lupus Erythematosus, Systemic/ (56771)  
 50 exp Respiratory Tract Diseases/ (1271873)  
 51 exp Respiratory Tract Infections/ (341882)  
 52 respiratory disease.mp. (15697)  
 53 renal disease.mp. (54706)  
 54 exp Kidney Failure, Chronic/ (89527)  
 55 exp Kidney Diseases/ (486724)  
 56 urinary disease.mp. (107)  
 57 exp Urinary Tract Infections/ (44487)  
 58 neurologic disease.mp. (3351)  
 59 lumbar stenosis.mp. (708)  
 60 exp Spinal Fusion/ (23190)  
 61 exp Spinal Stenosis/ (5598)  
 62 exp Discectomy/ (5017)  
 63 discectomy.mp. (5671)  
 64 exp Scoliosis/ (16867)  
 65 exp Parkinson Disease/ (60940)  
 66 exp Dementia/ (152129)  
 67 exp Depression/ (106981)  
 68 anterior approach.mp. (3581)  
 69 posterior approach.mp. (4150)  
 70 lateral approach.mp. (2388)  
 71 anterolateral approach.mp. (599)  
 72 posterolateral approach.mp. (640)  
 73 exp Hip Dislocation/ (6014)  
 74 dislocation.mp. (50116)  
 75 instability.mp. (113768)  
 76 exp Joint Instability/ (18869)  
 77 luxation.mp. (4415)  
 78 3 or 4 or 5 or 6 or 7 or 8 or 9 or 10 or 11 or 12 or 13 or 14 or 15 or 16 or 17 or 18 or 19 or 20 or 21 or 22 or 23 or 24 or 25 or 26 or 27 or 28 or 29  
 or 30 or 31 or 32 or 33 or 34 or 35 or 36 or 37 or 38 or 39 or 40 or 41 or 42 or 43 or 44 or 45 or 46 or 47 or 48 or 49 or 50 or 51 or 52 or 53 or 54 or 55  
 or 56 or 57 or 58 or 59 or 60 or 61 or 62 or 63 or 64 or 65 or 66 or 67 or 68 or 69 or 70 or 71 or 72 (13318407)  
 79 73 or 74 or 75 or 76 or 77 (160210)  
 80 1 and 2 and 78 and 79 (1058)  
 81 limit 80 to humans (1050)  
 \*\*\*\*\*

Each part was specifically translated for searching the other databases (EMBASE, Web of Science, and Cochrane databases)



## Appendix 5. Statistical analyses

We pooled the incidence rate for dislocation (estimated from the number of dislocations within average follow-up period/total number of participants or procedures as reported) with 95% confidence intervals (CIs). Given that we employed binary data with low dislocation rates, the Freeman-Tukey variance stabilising double arcsine transformation was used.<sup>1</sup> Temporal trends in dislocation rates were evaluated using the median year of data collection/surgery reported by studies, as previously reported.<sup>2</sup> Relative risks (RRs) with 95% confidence intervals (CIs) were used as summary measures of associations between the different exposures and risk of dislocation. Fully-adjusted risk estimates were used for pooling when reported, otherwise crude RRs were calculated from the raw counts extracted from studies. For studies with zero events in one of the arms (exposure or control), the RR was calculated with the ‘opposite-arm’ continuity correction.<sup>3</sup> Due to the variety of BMI cut-offs employed by the included studies, we used the following risk comparisons based on the data available:  $\geq 25$  vs.  $< 25$ ;  $\geq 30$  vs.  $< 30$ ;  $\geq 35$  vs.  $< 35$ ;  $\geq 50$  vs.  $< 50$  kg/m<sup>2</sup> and per unit increase in BMI, to ensure consistency in the pooling approach and enhance comparability and interpretation of findings as previously reported.<sup>4,5</sup> Random-effects models were used to combine RRs to minimize the effect of heterogeneity.<sup>6</sup> In the absence of substantial heterogeneity, fixed-effect models were employed. Heterogeneity was assessed using the Cochrane  $\chi^2$  statistic and the  $I^2$  statistic.<sup>7</sup> Several pre-defined study-level characteristics which may explain heterogeneity were explored using subgroup analyses and random effects meta-regression.<sup>8</sup> Funnel plots and Egger’s regression symmetry tests were used to assess for publication bias or small study effects<sup>9</sup> in pooled analysis involving 10 or more studies. The statistical analyses employed Stata MP 16 (Stata Corp, College Station, Texas, USA).

## References

1. Freeman MF, Tukey JW. Transformations Related to the Angular and the Square Root. *Ann Math Statist* 1950; 607-11.
2. Berstock JR, Beswick AD, Lopez-Lopez JA, Whitehouse MR, Blom AW. Mortality After Total Knee Arthroplasty: A Systematic Review of Incidence, Temporal Trends, and Risk Factors. *J Bone Joint Surg Am* 2018; **100**(12): 1064-70.
3. Sweeting MJ, Sutton AJ, Lambert PC. What to add to nothing? Use and avoidance of continuity corrections in meta-analysis of sparse data. *Stat Med* 2004; **23**(9): 1351-75.
4. Kunutsor SK, Whitehouse MR, Blom AW, Beswick AD, INFORM team. Patient-related risk factors for periprosthetic joint infection after total joint arthroplasty: A systematic review and meta-analysis. *PLoS one* 2016; **11**(3): e0150866.
5. Barrett MC, Whitehouse MR, Blom AW, Kunutsor SK. Host-related factors for venous thromboembolism following total joint replacement: A meta-analysis of 89 observational studies involving over 14 million hip and knee replacements. *J Orthop Sci* 2019.
6. DerSimonian R, Laird N. Meta-analysis in clinical trials. *Control Clin Trials* 1986; **7**(3): 177-88.
7. Higgins JP, Thompson SG, Deeks JJ, Altman DG. Measuring inconsistency in meta-analyses. *BMJ* 2003; **327**(7414): 557-60.
8. Thompson SG, Sharp SJ. Explaining heterogeneity in meta-analysis: a comparison of methods. *Stat Med* 1999; **18**(20): 2693-708.

9. Egger M, Davey Smith G, Schneider M, Minder C. Bias in meta-analysis detected by a simple, graphical test. *BMJ* 1997; **315**(7109): 629-34.

## Appendix 6. Reference list of 149 included articles

1. Angerame MR, Fehring TK, Masonis JL, Mason JB, Odum SM, Springer BD. Early Failure of Primary Total Hip Arthroplasty: Is Surgical Approach a Risk Factor? *The Journal of arthroplasty*. 2018;33(6):1780-1785.
2. Giardina F, Castagnini F, Stea S, Bordini B, Montalti M, Toni A. Short Stems Versus Conventional Stems in Cementless Total Hip Arthroplasty: A Long-Term Registry Study. *The Journal of arthroplasty*. 2018;33(6):1794-1799.
3. Ponzio DY, Poultsides LA, Salvatore A, Lee Y-Y, Memtsoudis SG, Alexiades MM. In-Hospital Morbidity and Postoperative Revisions After Direct Anterior vs Posterior Total Hip Arthroplasty. *The Journal of arthroplasty*. 2018;33(5):1421-1425.e1421.
4. Hwang J-H, Kim S-M, Oh K-J, Kim Y. Dislocations after use of dual-mobility cups in cementless primary total hip arthroplasty: prospective multicentre series. *International orthopaedics*. 2018;42(4):761-767.
5. Salib CG, Reina N, Perry KI, Taunton MJ, Berry DJ, Abdel MP. Lumbar fusion involving the sacrum increases dislocation risk in primary total hip arthroplasty. *The bone & joint journal*. 2019;101-B(2):198-206.
6. Gausden EB, Parhar HS, Popper JE, Sculco PK, Rush BNM. Risk Factors for Early Dislocation Following Primary Elective Total Hip Arthroplasty. *The Journal of arthroplasty*. 2018;33(5):1567-1571.e1562.
7. Rondon AJ, Tan TL, Schlitt PK, Greenky MR, Phillips JL, Purtill JJ. Total Joint Arthroplasty in Patients With Parkinson's Disease: Survivorship, Outcomes, and Reasons for Failure. *The Journal of arthroplasty*. 2018;33(4):1028-1032.
8. Li M, Xu C, Xie J, Hu Y, Liu H. Comparison of collum femoris-preserving stems and ribbed stems in primary total hip arthroplasty. *Journal of orthopaedic surgery and research*. 2018;13(1):271.
9. Malkani AL, Garber AT, Ong KL, et al. Total Hip Arthroplasty in Patients With Previous Lumbar Fusion Surgery: Are There More Dislocations and Revisions? *The Journal of arthroplasty*. 2018;33(4):1189-1193.
10. Hailer NP, Weiss RJ, Stark A, Karrholm J. The risk of revision due to dislocation after total hip arthroplasty depends on surgical approach, femoral head size, sex, and primary diagnosis. An analysis of 78,098 operations in the Swedish Hip Arthroplasty Register. *Acta orthopaedica*. 2012;83(5):442-448.
11. Seagrave KG, Troelsen A, Madsen BG, Husted H, Kalleose T, Gromov K. Can Surgeons Reduce the Risk for Dislocation After Primary Total Hip Arthroplasty Performed Using the Posterolateral Approach? *The Journal of arthroplasty*. 2017;32(10):3141-3146.
12. Rowan FE, Salvatore AJ, Lange JK, Westrich GH. Dual-Mobility vs Fixed-Bearing Total Hip Arthroplasty in Patients Under 55 Years of Age: A Single-Institution, Matched-Cohort Analysis. *The Journal of arthroplasty*. 2017;32(10):3076-3081.
13. Graves SE, de Steiger R, Davidson D, et al. The use of femoral stems with exchangeable necks in primary total hip arthroplasty increases the rate of revision. *The bone & joint journal*. 2017;99-B(6):766-773.
14. Utsunomiya T, Motomura G, Ikemura S, Hamai S, Fukushi J-I, Nakashima Y. The Results of Total Hip Arthroplasty After Sugioka Transtrochanteric Anterior Rotational Osteotomy for Osteonecrosis. *The Journal of arthroplasty*. 2017;32(9):2768-2773.
15. Shah SM, Walter WL, Tai SM, Lorimer MF, de Steiger RN. Late Dislocations After Total Hip Arthroplasty: Is the Bearing a Factor? *The Journal of arthroplasty*. 2017;32(9):2852-2856.
16. Mjaaland KE, Svenningsen S, Fenstad AM, Havelin LI, Furnes O, Nordsletten L. Implant Survival After Minimally Invasive Anterior or Anterolateral Vs. Conventional Posterior or Direct Lateral Approach: An

- Analysis of 21,860 Total Hip Arthroplasties from the Norwegian Arthroplasty Register (2008 to 2013). *The Journal of bone and joint surgery American volume*. 2017;99(10):840-847.
17. Abdel MP, Chalmers BP, Trousdale RT, Hanssen AD, Pagnano MW. Randomized Clinical Trial of 2-Incision vs Mini-Posterior Total Hip Arthroplasty: Differences Persist at 10 Years. *The Journal of arthroplasty*. 2017;32(9):2744-2747.
  18. Gofton WT, Illical EM, Feibel RJ, Kim PR, Beaulé PE. A Single-Center Experience With a Titanium Modular Neck Total Hip Arthroplasty. *The Journal of arthroplasty*. 2017;32(8):2450-2456.
  19. Buckland AJ, Puvanesarajah V, Vigdorichik J, et al. Dislocation of a primary total hip arthroplasty is more common in patients with a lumbar spinal fusion. *The bone & joint journal*. 2017;99-B(5):585-591.
  20. Zijlstra WP, De Hartog B, Van Steenberghe LN, Scheurs BW, Nelissen RGHH. Effect of femoral head size and surgical approach on risk of revision for dislocation after total hip arthroplasty. *Acta orthopaedica*. 2017;88(4):395-401.
  21. Meneghini RM, Elston AS, Chen AF, Kheir MM, Fehring TK, Springer BD. Direct Anterior Approach: Risk Factor for Early Femoral Failure of Cementless Total Hip Arthroplasty: A Multicenter Study. *The Journal of bone and joint surgery American volume*. 2017;99(2):99-105.
  22. Tarasevicius S, Smailys A, Grigaitis K, Robertsson O, Stucinskas J. Short-term outcome after total hip arthroplasty using dual-mobility cup: report from Lithuanian Arthroplasty Register. *International orthopaedics*. 2017;41(3):595-598.
  23. Prudhon JL, Verdier R, Caton JH. Low friction arthroplasty and dual mobility cup: a new gold standard. *International orthopaedics*. 2017;41(3):563-571.
  24. Perfetti DC, Schwarzkopf R, Buckland AJ, Paulino CB, Vigdorichik JM. Prosthetic Dislocation and Revision After Primary Total Hip Arthroplasty in Lumbar Fusion Patients: A Propensity Score Matched-Pair Analysis. *The Journal of arthroplasty*. 2017;32(5):1635-1640.e1631.
  25. Kurtz SM, Lau E, Baykal D, Springer BD. Outcomes of Ceramic Bearings After Primary Total Hip Arthroplasty in the Medicare Population. *The Journal of arthroplasty*. 2017;32(3):743-749.
  26. Charles R, LaTulip S, Goulet JA, Pour AE. Previous arthroscopic repair of femoro-acetabular impingement does not affect outcomes of total hip arthroplasty. *International orthopaedics*. 2017;41(6):1125-1129.
  27. Sadhu A, Nam D, Coobs BR, Barrack TN, Nunley RM, Barrack RL. Acetabular Component Position and the Risk of Dislocation Following Primary and Revision Total Hip Arthroplasty: A Matched Cohort Analysis. *The Journal of arthroplasty*. 2017;32(3):987-991.
  28. Werner BC, Higgins MD, Pehlivan HC, Carothers JT, Browne JA. Super Obesity Is an Independent Risk Factor for Complications After Primary Total Hip Arthroplasty. *The Journal of arthroplasty*. 2017;32(2):402-406.
  29. Cafri G, Paxton EW, Love R, Bini SA, Kurtz SM. Is There a Difference in Revision Risk Between Metal and Ceramic Heads on Highly Crosslinked Polyethylene Liners? *Clinical orthopaedics and related research*. 2017;475(5):1349-1355.
  30. Ancelin D, Reina N, Cavaignac E, Delclaux S, Chiron P. Total hip arthroplasty survival in femoral head avascular necrosis versus primary hip osteoarthritis: Case-control study with a mean 10-year follow-up after anatomical cementless metal-on-metal 28-mm replacement. *Orthopaedics & traumatology, surgery & research : OTSR*. 2016;102(8):1029-1034.
  31. Lee S-W, Kim W-Y, Kang M-S. Primary total hip arthroplasty using modified posterior approach through quadratus femoris flap osteotomy; comparison with conventional posterior approach. *Hip international : the journal of clinical and experimental research on hip pathology and therapy*. 2016;26(6):543-549.

32. Sing DC, Barry JJ, Aguilar TU, et al. Prior Lumbar Spinal Arthrodesis Increases Risk of Prosthetic-Related Complication in Total Hip Arthroplasty. *The Journal of arthroplasty*. 2016;31(9 Suppl):227-232.e221.
33. Blizzard DJ, Klement MR, Penrose CT, Sheets CZ, Bolognesi MP, Seyler TM. Cervical Myelopathy Doubles the Rate of Dislocation and Fracture After Total Hip Arthroplasty. *The Journal of arthroplasty*. 2016;31(9 Suppl):242-247.
34. Menendez ME, Ring D, Barnes CL. Inpatient Dislocation After Primary Total Hip Arthroplasty. *The Journal of arthroplasty*. 2016;31(12):2889-2893.
35. Malek IA, Royce G, Bhatti SU, et al. A comparison between the direct anterior and posterior approaches for total hip arthroplasty: the role of an 'Enhanced Recovery' pathway. *The bone & joint journal*. 2016;98-B(6):754-760.
36. Wagner ER, Kamath AF, Fruth KM, Harmsen WS, Berry DJ. Effect of Body Mass Index on Complications and Reoperations After Total Hip Arthroplasty. *The Journal of bone and joint surgery American volume*. 2016;98(3):169-179.
37. Opperer M, Lee Y-y, Nally F, Blanes Perez A, Goudarz-Mehdikhani K, Gonzalez Della Valle A. A critical analysis of radiographic factors in patients who develop dislocation after elective primary total hip arthroplasty. *International orthopaedics*. 2016;40(4):703-708.
38. Garcia-Rey E, Garcia-Cimbrello E. Abductor Biomechanics Clinically Impact the Total Hip Arthroplasty Dislocation Rate: A Prospective Long-Term Study. *The Journal of arthroplasty*. 2016;31(2):484-490.
39. Haughom BD, Plummer DR, Moric M, Della Valle CJ. Is There a Benefit to Head Size Greater Than 36 mm in Total Hip Arthroplasty? *The Journal of arthroplasty*. 2016;31(1):152-155.
40. Fujishiro T, Hiranaka T, Hashimoto S, et al. The effect of acetabular and femoral component version on dislocation in primary total hip arthroplasty. *International orthopaedics*. 2016;40(4):697-702.
41. Abdel MP, von Roth P, Jennings MT, Hanssen AD, Pagnano MW. What Safe Zone? The Vast Majority of Dislocated THAs Are Within the Lewinnek Safe Zone for Acetabular Component Position. *Clinical orthopaedics and related research*. 2016;474(2):386-391.
42. Spaans EA, Spaans AJ, van den Hout JAAM, Bolder SBT. The result of transmuscular versus transosseous repair of the posterior capsule on early dislocations in primary hip arthroplasty. *Hip international : the journal of clinical and experimental research on hip pathology and therapy*. 2015;25(6):537-542.
43. Pitto RP, Garland M, Sedel L. Are ceramic-on-ceramic bearings in total hip arthroplasty associated with reduced revision risk for late dislocation? *Clinical orthopaedics and related research*. 2015;473(12):3790-3795.
44. Jansen E, Peltola M, Puolakka T, Eskelinen A, Lehto MUK. Surgical outcomes of hip and knee arthroplasties for primary osteoarthritis in patients with Alzheimer's disease: a nationwide registry-based case-controlled study. *The bone & joint journal*. 2015;97-B(5):654-661.
45. Sheth D, Cafri G, Inacio MCS, Paxton EW, Namba RS. Anterior and Anterolateral Approaches for THA Are Associated With Lower Dislocation Risk Without Higher Revision Risk. *Clinical orthopaedics and related research*. 2015;473(11):3401-3408.
46. Maisongrosse P, Lepage B, Cavaignac E, et al. Obesity is no longer a risk factor for dislocation after total hip arthroplasty with a double-mobility cup. *International orthopaedics*. 2015;39(7):1251-1258.
47. Sanz-Reig J, Lizaur-Utrilla A, Miralles-Munoz F. [Risk factors for total hip arthroplasty dislocation and its functional outcomes]. *Factores de riesgo de luxacion de artroplastia total de cadera primaria y su resultado funcional*. 2015;59(1):19-25.

48. Delaunay C. Effect of hydroxyapatite coating on the radio-clinical results of a grit-blasted titanium alloy femoral taper. A case-control study of 198 cementless primary total hip arthroplasty with the AlloclassicTM system. *Orthopaedics & traumatology, surgery & research : OTSR*. 2014;100(7):739-744.
49. Insull PJ, Cobbett H, Frampton CM, Munro JT. The use of a lipped acetabular liner decreases the rate of revision for instability after total hip replacement: a study using data from the New Zealand Joint Registry. *The bone & joint journal*. 2014;96-B(7):884-888.
50. Kaneko T, Hirakawa K, Fushimi K. Relationship between peri-operative outcomes and hospital surgical volume of total hip arthroplasty in Japan. *Health policy (Amsterdam, Netherlands)*. 2014;117(1):48-53.
51. Caton JH, Prudhon JL, Ferreira A, Aslanian T, Verdier R. A comparative and retrospective study of three hundred and twenty primary Charnley type hip replacements with a minimum follow up of ten years to assess whether a dual mobility cup has a decreased dislocation risk. *International orthopaedics*. 2014;38(6):1125-1129.
52. Jamsen E, Puolakka T, Peltola M, Eskelinen A, Lehto MUK. Surgical outcomes of primary hip and knee replacements in patients with Parkinson's disease: a nationwide registry-based case-controlled study. *The bone & joint journal*. 2014;96-B(4):486-491.
53. Gerhardt DMJM, Bisseling P, de Visser E, van Susante JLC. Modular necks in primary hip arthroplasty without anatomical deformity: no clear benefit on restoration of hip geometry and dislocation rate. An exploratory study. *The Journal of arthroplasty*. 2014;29(8):1553-1558.
54. Ravi B, Croxford R, Hollands S, et al. Increased risk of complications following total joint arthroplasty in patients with rheumatoid arthritis. *Arthritis & rheumatology (Hoboken, NJ)*. 2014;66(2):254-263.
55. Jameson SS, Mason J, Baker P, et al. A comparison of surgical approaches for primary hip arthroplasty: a cohort study of patient reported outcome measures (PROMs) and early revision using linked national databases. *The Journal of arthroplasty*. 2014;29(6):1248-1255.e1241.
56. Bergh C, Fenstad AM, Furnes O, et al. Increased risk of revision in patients with non-traumatic femoral head necrosis. *Acta orthopaedica*. 2014;85(1):11-17.
57. Nakashima Y, Hirata M, Akiyama M, et al. Combined anteversion technique reduced the dislocation in cementless total hip arthroplasty. *International orthopaedics*. 2014;38(1):27-32.
58. Kostensalo I, Junnila M, Virolainen P, et al. Effect of femoral head size on risk of revision for dislocation after total hip arthroplasty: a population-based analysis of 42,379 primary procedures from the Finnish Arthroplasty Register. *Acta orthopaedica*. 2013;84(4):342-347.
59. Leichtle UG, Leichtle CI, Taslaci F, Reize P, Wunschel M. Dislocation after total hip arthroplasty: risk factors and treatment options. *Acta orthopaedica et traumatologica turcica*. 2013;47(2):96-103.
60. Lachiewicz PF, Soileau ES. Low early and late dislocation rates with 36- and 40-mm heads in patients at high risk for dislocation. *Clinical orthopaedics and related research*. 2013;471(2):439-443.
61. Lindgren V, Garellick G, Karrholm J, Wretenberg P. The type of surgical approach influences the risk of revision in total hip arthroplasty: a study from the Swedish Hip Arthroplasty Register of 90,662 total hip replacements with 3 different cemented prostheses. *Acta orthopaedica*. 2012;83(6):559-565.
62. Howie DW, Holubowycz OT, Middleton R, Large Articulation Study G. Large femoral heads decrease the incidence of dislocation after total hip arthroplasty: a randomized controlled trial. *The Journal of bone and joint surgery American volume*. 2012;94(12):1095-1102.
63. Zhang Z-j, Zhao X-y, Kang Y, et al. The influence of body mass index on life quality and clinical improvement after total hip arthroplasty. *Journal of orthopaedic science : official journal of the Japanese Orthopaedic Association*. 2012;17(3):219-225.

64. Davis AM, Wood AM, Keenan ACM, Brenkel IJ, Ballantyne JA. Does body mass index affect clinical outcome post-operatively and at five years after primary unilateral total hip replacement performed for osteoarthritis? A multivariate analysis of prospective data. *The Journal of bone and joint surgery British volume*. 2011;93(9):1178-1182.
65. Lazarinis S, Karrholm J, Hailer NP. Effects of hydroxyapatite coating on survival of an uncemented femoral stem. A Swedish Hip Arthroplasty Register study on 4,772 hips. *Acta orthopaedica*. 2011;82(4):399-404.
66. Molli RG, Lombardi AV, Jr., Berend KR, Adams JB, Sneller MA. Metal-on-metal vs metal-on-improved polyethylene bearings in total hip arthroplasty. *The Journal of arthroplasty*. 2011;26(6 Suppl):8-13.
67. Edmunds CT, Boscainos PJ. Effect of surgical approach for total hip replacement on hip function using Harris Hip scores and Trendelenburg's test. A retrospective analysis. *The surgeon : journal of the Royal Colleges of Surgeons of Edinburgh and Ireland*. 2011;9(3):124-129.
68. Clement ND, Muzammil A, Macdonald D, Howie CR, Biant LC. Socioeconomic status affects the early outcome of total hip replacement. *The Journal of bone and joint surgery British volume*. 2011;93(4):464-469.
69. Peter R, Lubbeke A, Stern R, Hoffmeyer P. Cup size and risk of dislocation after primary total hip arthroplasty. *The Journal of arthroplasty*. 2011;26(8):1305-1309.
70. Bouchet R, Mercier N, Saragaglia D. Posterior approach and dislocation rate: a 213 total hip replacements case-control study comparing the dual mobility cup with a conventional 28-mm metal head/polyethylene prosthesis. *Orthopaedics & traumatology, surgery & research : OTSR*. 2011;97(1):2-7.
71. Makela KT, Hakkinen U, Peltola M, Linna M, Kroger H, Remes V. The effect of hospital volume on length of stay, re-admissions, and complications of total hip arthroplasty. *Acta orthopaedica*. 2011;82(1):20-26.
72. Dudda M, Gueleryuez A, Gautier E, Busato A, Roeder C. Risk factors for early dislocation after total hip arthroplasty: a matched case-control study. *Journal of orthopaedic surgery (Hong Kong)*. 2010;18(2):179-183.
73. Krenzel BA, Berend ME, Malinzak RA, et al. High preoperative range of motion is a significant risk factor for dislocation in primary total hip arthroplasty. *The Journal of arthroplasty*. 2010;25(6 Suppl):31-35.
74. Amlie E, Hovik O, Reikeras O. Dislocation after total hip arthroplasty with 28 and 32-mm femoral head. *Journal of orthopaedics and traumatology : official journal of the Italian Society of Orthopaedics and Traumatology*. 2010;11(2):111-115.
75. Soohoo NF, Farnig E, Lieberman JR, Chambers L, Zingmond DS. Factors that predict short-term complication rates after total hip arthroplasty. *Clinical orthopaedics and related research*. 2010;468(9):2363-2371.
76. Bozic KJ, Ong K, Lau E, et al. Risk of complication and revision total hip arthroplasty among Medicare patients with different bearing surfaces. *Clinical orthopaedics and related research*. 2010;468(9):2357-2362.
77. Kim Y-H, Choi Y, Kim J-S. Influence of patient-, design-, and surgery-related factors on rate of dislocation after primary cementless total hip arthroplasty. *The Journal of arthroplasty*. 2009;24(8):1258-1263.
78. Sexton SA, Walter WL, Jackson MP, De Steiger R, Stanford T. Ceramic-on-ceramic bearing surface and risk of revision due to dislocation after primary total hip replacement. *The Journal of bone and joint surgery British volume*. 2009;91(11):1448-1453.
79. Hooper GJ, Rothwell AG, Stringer M, Frampton C. Revision following cemented and uncemented primary total hip replacement: a seven-year analysis from the New Zealand Joint Registry. *The Journal of bone and joint surgery British volume*. 2009;91(4):451-458.
80. Lubbeke A, Suva D, Perneger T, Hoffmeyer P. Influence of preoperative patient education on the risk of dislocation after primary total hip arthroplasty. *Arthritis and rheumatism*. 2009;61(4):552-558.

81. Palan J, Beard DJ, Murray DW, Andrew JG, Nolan J. Which approach for total hip arthroplasty: anterolateral or posterior? *Clinical orthopaedics and related research*. 2009;467(2):473-477.
82. Blom AW, Rogers M, Taylor AH, Pattison G, Whitehouse S, Bannister GC. Dislocation following total hip replacement: the Avon Orthopaedic Centre experience. *Annals of the Royal College of Surgeons of England*. 2008;90(8):658-662.
83. Conroy JL, Whitehouse SL, Graves SE, Pratt NL, Ryan P, Crawford RW. Risk factors for revision for early dislocation in total hip arthroplasty. *The Journal of arthroplasty*. 2008;23(6):867-872.
84. Grant JA, Viens N, Bolognesi MP, Olson SA, Cook CE. Two-year outcomes in primary THA in obese male veterans administration medical center patients. *Rheumatology international*. 2008;28(11):1105-1109.
85. Andrew JG, Palan J, Kurup HV, Gibson P, Murray DW, Beard DJ. Obesity in total hip replacement. *The Journal of bone and joint surgery British volume*. 2008;90(4):424-429.
86. Tsai S-J, Wang C-T, Jiang C-C. The effect of posterior capsule repair upon post-operative hip dislocation following primary total hip arthroplasty. *BMC musculoskeletal disorders*. 2008;9:29.
87. Sadr Azodi O, Adami J, Lindstrom D, Eriksson KO, Wladis A, Bellocco R. High body mass index is associated with increased risk of implant dislocation following primary total hip replacement: 2,106 patients followed for up to 8 years. *Acta orthopaedica*. 2008;79(1):141-147.
88. Arthursson AJ, Furnes O, Espehaug B, Havelin LI, Soreide JA. Prosthesis survival after total hip arthroplasty--does surgical approach matter? Analysis of 19,304 Charnley and 6,002 Exeter primary total hip arthroplasties reported to the Norwegian Arthroplasty Register. *Acta orthopaedica*. 2007;78(6):719-729.
89. Peters CL, McPherson E, Jackson JD, Erickson JA. Reduction in early dislocation rate with large-diameter femoral heads in primary total hip arthroplasty. *The Journal of arthroplasty*. 2007;22(6 Suppl 2):140-144.
90. Lubbeke A, Stern R, Garavaglia G, Zurcher L, Hoffmeyer P. Differences in outcomes of obese women and men undergoing primary total hip arthroplasty. *Arthritis and rheumatism*. 2007;57(2):327-334.
91. Berry DJ, von Knoch M, Schleck CD, Harmsen WS. Effect of femoral head diameter and operative approach on risk of dislocation after primary total hip arthroplasty. *The Journal of bone and joint surgery American volume*. 2005;87(11):2456-2463.
92. Zwartele RE, Brand R, Doets HC. Increased risk of dislocation after primary total hip arthroplasty in inflammatory arthritis: a prospective observational study of 410 hips. *Acta orthopaedica Scandinavica*. 2004;75(6):684-690.
93. Lawton RL, Morrey BF. Dislocation after long-necked total hip arthroplasty. *Clinical orthopaedics and related research*. 2004(422):164-166.
94. Suh KT, Park BG, Choi YJ. A posterior approach to primary total hip arthroplasty with soft tissue repair. *Clinical orthopaedics and related research*. 2004(418):162-167.
95. Bystrom S, Espehaug B, Furnes O, Havelin LI, Norwegian Arthroplasty R. Femoral head size is a risk factor for total hip luxation: a study of 42,987 primary hip arthroplasties from the Norwegian Arthroplasty Register. *Acta orthopaedica Scandinavica*. 2003;74(5):514-524.
96. Weeden SH, Paprosky WG, Bowling JW. The early dislocation rate in primary total hip arthroplasty following the posterior approach with posterior soft-tissue repair. *The Journal of arthroplasty*. 2003;18(6):709-713.
97. van Stralen GMJ, Struben PJ, van Loon CJM. The incidence of dislocation after primary total hip arthroplasty using posterior approach with posterior soft-tissue repair. *Archives of orthopaedic and trauma surgery*. 2003;123(5):219-222.



98. Mahomed NN, Barrett JA, Katz JN, et al. Rates and outcomes of primary and revision total hip replacement in the United States medicare population. *The Journal of bone and joint surgery American volume*. 2003;85-A(1):27-32.
99. von Knoch M, Berry DJ, Harmsen WS, Morrey BF. Late dislocation after total hip arthroplasty. *The Journal of bone and joint surgery American volume*. 2002;84-A(11):1949-1953.
100. Jolles BM, Zangger P, Leyvraz PF. Factors predisposing to dislocation after primary total hip arthroplasty: a multivariate analysis. *The Journal of arthroplasty*. 2002;17(3):282-288.
101. Katz JN, Losina E, Barrett J, et al. Association between hospital and surgeon procedure volume and outcomes of total hip replacement in the United States medicare population. *The Journal of bone and joint surgery American volume*. 2001;83-A(11):1622-1629.
102. Li E, Meding JB, Ritter MA, Keating EM, Faris PM. The natural history of a posteriorly dislocated total hip replacement. *The Journal of arthroplasty*. 1999;14(8):964-968.
103. Woolson ST, Rahimtoola ZO. Risk factors for dislocation during the first 3 months after primary total hip replacement. *The Journal of arthroplasty*. 1999;14(6):662-668.
104. Mallory TH, Lombardi AV, Jr., Fada RA, Herrington SM, Eberle RW. Dislocation after total hip arthroplasty using the anterolateral abductor split approach. *Clinical orthopaedics and related research*. 1999(358):166-172.
105. Inacio MC, Ake CF, Paxton EW, et al. Sex and risk of hip implant failure: assessing total hip arthroplasty outcomes in the United States. *JAMA Intern Med*. 2013;173(6):435-441.
106. Jorgensen CC, Kjaersgaard-Andersen P, Solgaard S, Kehlet H, Lundbeck Foundation Centre for Fast-track H, Knee Replacement Collaborative G. Hip dislocations after 2,734 elective unilateral fast-track total hip arthroplasties: incidence, circumstances and predisposing factors. *Arch Orthop Trauma Surg*. 2014;134(11):1615-1622.
107. Esposito CI, Gladnick BP, Lee YY, et al. Cup position alone does not predict risk of dislocation after hip arthroplasty. *J Arthroplasty*. 2015;30(1):109-113.
108. Chee YH, Teoh KH, Sabnis BM, Ballantyne JA, Brenkel IJ. Total hip replacement in morbidly obese patients with osteoarthritis: results of a prospectively matched study. *J Bone Joint Surg Br*. 2010;92(8):1066-1071.
109. Ibrahim T, Hobson S, Beiri A, Esler CN. No influence of body mass index on early outcome following total hip arthroplasty. *Int Orthop*. 2005;29(6):359-361.
110. Lehman DE, Capello WN, Feinberg JR. Total hip arthroplasty without cement in obese patients. A minimum two-year clinical and radiographic follow-up study. *J Bone Joint Surg Am*. 1994;76(6):854-862.
111. Namba RS, Paxton L, Fithian DC, Stone ML. Obesity and perioperative morbidity in total hip and total knee arthroplasty patients. *J Arthroplasty*. 2005;20(7 Suppl 3):46-50.
112. Paterno SA, Lachiewicz PF, Kelley SS. The influence of patient-related factors and the position of the acetabular component on the rate of dislocation after total hip replacement. *J Bone Joint Surg Am*. 1997;79(8):1202-1210.
113. Hernigou P, Trousselier M, Roubineau F, Bouthors C, Flouzat Lachaniette CH. Dual-mobility or Constrained Liners Are More Effective Than Preoperative Bariatric Surgery in Prevention of THA Dislocation. *Clinical orthopaedics and related research*. 2016;474(10):2202-2210.
114. Houdek MT, Watts CD, Wyles CC, Trousdale RT, Milbrandt TA, Taunton MJ. Total Hip Arthroplasty in Patients with Cerebral Palsy: A Cohort Study Matched to Patients with Osteoarthritis. *J Bone Joint Surg Am*. 2017;99(6):488-493.

115. White RE, Jr., Forness TJ, Allman JK, Junick DW. Effect of posterior capsular repair on early dislocation in primary total hip replacement. *Clin Orthop Relat Res.* 2001(393):163-167.
116. Sierra RJ, Raposo JM, Trousdale RT, Cabanela ME. Dislocation of primary THA done through a posterolateral approach in the elderly. *Clinical orthopaedics and related research.* 2005;441:262-267.
117. Pellicci PM, Bostrom M, Poss R. Posterior approach to total hip replacement using enhanced posterior soft tissue repair. *Clin Orthop Relat Res.* 1998(355):224-228.
118. Carlson DC, Robinson HJ, Jr. Surgical approaches for primary total hip arthroplasty. A prospective comparison of the Marcy modification of the Gibson and Watson-Jones approaches. *Clin Orthop Relat Res.* 1987(222):161-166.
119. Roberts JM, Fu FH, McClain EJ, Ferguson AB, Jr. A comparison of the posterolateral and anterolateral approaches to total hip arthroplasty. *Clin Orthop Relat Res.* 1984(187):205-210.
120. Robinson RP, Robinson HJ, Jr., Salvati EA. Comparison of the transtrochanteric and posterior approaches for total hip replacement. *Clin Orthop Relat Res.* 1980(147):143-147.
121. Vicar AJ, Coleman CR. A comparison of the anterolateral, transtrochanteric, and posterior surgical approaches in primary total hip arthroplasty. *Clin Orthop Relat Res.* 1984(188):152-159.
122. Weaver JK. Total hip replacement: a comparison between the transtrochanteric and posterior surgical approaches. *Clin Orthop Relat Res.* 1975(112):201-207.
123. Barrett WP, Turner SE, Leopold JP. Prospective randomized study of direct anterior vs postero-lateral approach for total hip arthroplasty. *J Arthroplasty.* 2013;28(9):1634-1638.
124. Cheng TE, Wallis JA, Taylor NF, et al. A Prospective Randomized Clinical Trial in Total Hip Arthroplasty- Comparing Early Results Between the Direct Anterior Approach and the Posterior Approach. *The Journal of arthroplasty.* 2017;32(3):883-890.
125. Rosenlund S, Broeng L, Holsgaard-Larsen A, Jensen C, Overgaard S. Patient-reported outcome after total hip arthroplasty: comparison between lateral and posterior approach. *Acta Orthop.* 2017;88(3):239-247.
126. Martin CT, Pugely AJ, Gao Y, Clark CR. A comparison of hospital length of stay and short-term morbidity between the anterior and the posterior approaches to total hip arthroplasty. *J Arthroplasty.* 2013;28(5):849-854.
127. Laffosse JM, Chiron P, Tricoire JL, Giordano G, Molinier F, Puget J. [Prospective and comparative study of minimally invasive posterior approach versus standard posterior approach in total hip replacement]. *Rev Chir Orthop Reparatrice Appar Mot.* 2007;93(3):228-237.
128. Rodriguez JA, Deshmukh AJ, Rathod PA, et al. Does the direct anterior approach in THA offer faster rehabilitation and comparable safety to the posterior approach? *Clin Orthop Relat Res.* 2014;472(2):455-463.
129. Faldini C, Perna F, Mazzotti A, et al. Direct anterior approach versus posterolateral approach in total hip arthroplasty: effects on early post-operative rehabilitation period. *J Biol Regul Homeost Agents.* 2017;31(4 suppl 1):75-81.
130. Rathod PA, Bhalla S, Deshmukh AJ, Rodriguez JA. Does fluoroscopy with anterior hip arthroplasty decrease acetabular cup variability compared with a nonguided posterior approach? *Clin Orthop Relat Res.* 2014;472(6):1877-1885.
131. Tripuraneni KR, Munson NR, Archibeck MJ, Carothers JT. Acetabular Abduction and Dislocations in Direct Anterior vs Posterior Total Hip Arthroplasty: A Retrospective, Matched Cohort Study. *J Arthroplasty.* 2016;31(10):2299-2302.

132. Tsukada S, Wakui M. Lower Dislocation Rate Following Total Hip Arthroplasty via Direct Anterior Approach than via Posterior Approach: Five-Year-Average Follow-Up Results. *Open Orthop J.* 2015;9:157-162.
133. Amlie E, Havelin LI, Furnes O, et al. Worse patient-reported outcome after lateral approach than after anterior and posterolateral approach in primary hip arthroplasty. A cross-sectional questionnaire study of 1,476 patients 1-3 years after surgery. *Acta Orthop.* 2014;85(5):463-469.
134. Downing ND, Clark DI, Hutchinson JW, Colclough K, Howard PW. Hip abductor strength following total hip arthroplasty: a prospective comparison of the posterior and lateral approach in 100 patients. *Acta Orthop Scand.* 2001;72(3):215-220.
135. Homma Y, Baba T, Kobayashi H, et al. Benefit and risk in short term after total hip arthroplasty by direct anterior approach combined with dual mobility cup. *European journal of orthopaedic surgery & traumatology : orthopedie traumatologie.* 2016;26(6):619-624.
136. Chiu FY, Chen CM, Chung TY, Lo WH, Chen TH. The effect of posterior capsulorrhaphy in primary total hip arthroplasty: a prospective randomized study. *The Journal of arthroplasty.* 2000;15(2):194-199.
137. Goldstein WM, Gleason TF, Kopplin M, Branson JJ. Prevalence of dislocation after total hip arthroplasty through a posterolateral approach with partial capsulotomy and capsulorrhaphy. *J Bone Joint Surg Am.* 2001;83-A Suppl 2(Pt 1):2-7.
138. Kim YS, Kwon SY, Sun DH, Han SK, Maloney WJ. Modified posterior approach to total hip arthroplasty to enhance joint stability. *Clinical orthopaedics and related research.* 2008;466(2):294-299.
139. Tarasevicius S, Kesteris U, Kalesinskas RJ, Wingstrand H. Dynamics of hip joint effusion after posterior soft tissue repair in total hip arthroplasty. *Int Orthop.* 2006;30(4):233-236.
140. Tarasevicius S, Robertsson O, Wingstrand H. Posterior soft tissue repair in total hip arthroplasty: a randomized controlled trial. *Orthopedics.* 2010;33(12):871.
141. Cobb TK, Morrey BF, Ilstrup DM. The elevated-rim acetabular liner in total hip arthroplasty: relationship to postoperative dislocation. *J Bone Joint Surg Am.* 1996;78(1):80-86.
142. Hedlundh U, Ahnfelt L, Hybbinette CH, Weckstrom J, Fredin H. Surgical experience related to dislocations after total hip arthroplasty. *J Bone Joint Surg Br.* 1996;78(2):206-209.
143. Stroh DA, Issa K, Johnson AJ, Delanois RE, Mont MA. Reduced dislocation rates and excellent functional outcomes with large-diameter femoral heads. *J Arthroplasty.* 2013;28(8):1415-1420.
144. Epinette J-A. Clinical outcomes, survivorship and adverse events with mobile-bearings versus fixed-bearings in hip arthroplasty-a prospective comparative cohort study of 143 ADM versus 130 trident cups at 2 to 6-year follow-up. *The Journal of arthroplasty.* 2015;30(2):241-248.
145. Kelley SS, Lachiewicz PF, Hickman JM, Paterno SM. Relationship of femoral head and acetabular size to the prevalence of dislocation. *Clinical orthopaedics and related research.* 1998(355):163-170.
146. Surace MF, Monestier L, D'Angelo F, Bertagnon A. Factors Predisposing to Dislocation After Primary Total Hip Arthroplasty: A Multivariate Analysis of Risk Factors at 7 to 10 Years Follow-up. *Surgical technology international.* 2016;30:274-278.
147. Karrholm J, Herberts P, Garellick G. [Increasing incidence of early reoperation of dislocation after primary hip arthroplasty. An analysis of the national hip arthroplasty registry]. *Tidig omoperation for luxation av primar hoftprotes okar En analys av nationella hoftprotesregistret.* 2006;103(36):2547-2550.
148. Ravi B, Jenkinson R, Austin PC, et al. Relation between surgeon volume and risk of complications after total hip arthroplasty: propensity score matched cohort study. *BMJ (Clinical research ed).* 2014;348:g3284.

149. Prietzel T, Hammer N, Schleifenbaum S, et al. [The impact of capsular repair on the dislocation rate after primary total hip arthroplasty: a retrospective analysis of 1972 cases]. *Der Einfluss der Kapselrekonstruktion auf die Luxationsrate nach primärer Hüftendoprothetik: eine retrospektive Analyse von 1972 Fällen.* 2014;152(2):130-143.

## Appendix 7. Characteristics of studies included in review

| Author, year of publication | Year of study | Country     | Mean/median age (years) | Study design         | % Males | Mean/median follow-up duration (years) | No. of participants | No. of dislocations | Study quality |
|-----------------------------|---------------|-------------|-------------------------|----------------------|---------|----------------------------------------|---------------------|---------------------|---------------|
| Salib, 2019                 | 1988-2015     | USA         | 71·0                    | Retrospective cohort | 44·0    | 6·0                                    | 291                 | 9                   | 8             |
| Angerame, 2018              | 2007-2014     | USA         | 60·2                    | Retrospective cohort | 40·5    | 0·8                                    | 6894                | 26                  | 8             |
| Giardina, 2018              | 2000-2016     | Italy       | 61·9-67·5               | Retrospective cohort | 27·4    | 7·0                                    | 57 359              | 376                 | 6             |
| Ponzio, 2018                | 2010-2012     | USA         | 64·7                    | Retrospective cohort | 44·6    | 4·6                                    | 4538                | 66                  | 8             |
| Hwang, 2018                 | 2013-2015     | South Korea | 72·0                    | Prospective cohort   | 30·5    | 1·8                                    | 167                 | 4                   | 8             |
| Gausden, 2018               | 2012-2014     | USA         | 64·5                    | Retrospective cohort | 45·1    | 40 days                                | 207 285             | 2842                | 6             |
| Rondon, 2018                | 2000-2016     | USA         | 69·3                    | Retrospective cohort | 55·0    | 5·3                                    | 145                 | 4                   | 8             |
| Li, 2018                    | 2010-2012     | China       | 42·8                    | Retrospective cohort | 56·0    | 5·7                                    | 141                 | 4                   | 7             |
| Malkani, 2018               | 1997-2014     | USA         | 65-85+                  | Retrospective cohort | 65-85+* | Up to 10·0                             | 62 387              | 3042                | 7             |
| Seagrave, 2017              | 2010-2015     | Denmark     | NR                      | Retrospective cohort | NR      | 1·9                                    | 1326                | 59                  | 6             |
| Cheng, 2017                 | 2014-2015     | Australia   | 61·0                    | RCT                  | 45·0    | 12 weeks                               | 73                  | 2                   | NA            |
| Rosenlund, 2017             | 2012-2014     | Denmark     | 61·0                    | RCT                  | 67·5    | 1·0                                    | 77                  | 1                   | NA            |
| Graves, 2017                | 1999-2014     | Australia   | NR                      | Retrospective cohort | NR      | 10·0                                   | 262 454             | 2023                | 7             |
| Utsunomiya, 2017            | 1998-2010     | Japan       | 57·8                    | Retrospective cohort | 50·0    | 8·3                                    | 44                  | 4                   | 6             |
| Shah, 2017                  | 1999-2014     | Australia   | NR                      | Prospective cohort   | NR      | 13·0                                   | 192 275             | 1219                | 7             |
| Mjaaland, 2017              | 2008-2013     | Norway      | 65·0                    | Prospective cohort   | 37·1    | 4·3                                    | 21 860              | 154                 | 7             |
| Abdel, 2017                 | 2004-2006     | USA         | 66·0                    | RCT                  | 44·4    | 8·5                                    | 71                  | 5                   | NA            |
| Goffon, 2017                | 2005-2012     | USA         | 62·2                    | Prospective cohort   | 45·0    | 5·7                                    | 809                 | 9                   | 8             |
| Buckland, 2017              | 2005-2012     | USA         | <65-85+                 | Retrospective cohort | 38·5    | 1·0                                    | 853 677             | 13 446              | 6             |
| Houdek, 2017                | 1990-2013     | USA         | 49·0                    | Prospective cohort   | 66·7    | 7·0                                    | 117                 | 6                   | 6             |
| Faldini, 2017               | 2014-2017     | Italy       | 64·5                    | Retrospective cohort | 41·7    | 0·5                                    | 127                 | 1                   | 6             |
| Zijlstra, 2017              | 2007-2015     | Netherlands | 60-74                   | Prospective cohort   | NR      | 6·0                                    | 166 231             | 1095                | 6             |
| Meneghini, 2017             | 2011-2014     | USA         | 61·9                    | Retrospective cohort | 46·5    | 5·0                                    | 342                 | 40                  | 8             |
| Tarasevicius, 2017          | 2011-2014     | Lithuania   | 67·4                    | Prospective cohort   | 36·7    | 2·5                                    | 2790                | 56                  | 8             |
| Prudhon, 2017               | 1994-2015     | France      | 69·3                    | Retrospective cohort | 37·6    | 13·5                                   | 1091                | 57                  | 6             |
| Perfetti, 2017              | 2005-2015     | USA         | 64·5                    | Retrospective cohort | 38·3    | 1·0                                    | 1868                | 32                  | 7             |
| Kurtz, 2017                 | 2005-2014     | USA         | 74·3                    | Retrospective cohort | 38·0    | 9·0                                    | 315 784             | 4737                | 7             |
| Charles, 2017***            | 2008-2013     | USA         | 43·1                    | Case-control         | 35·9    | 4·2                                    | 78                  | 2                   | 6             |
| Sadhu, 2017***              | 1997-2013     | USA         | 59·5                    | Retrospective cohort | 45·8    | 1·1                                    | 192                 | 96                  | 7             |
| Werner, 2017                | 2005-2012     | USA         | <65-80+                 | Retrospective cohort | <65-80+ | 90 days                                | 891 567             | 12 447              | 8             |
| Cafri, 2017                 | 2001-2013     | USA         | 67·0                    | Retrospective cohort | 43·0    | 1·0                                    | 28 772              | 236                 | 8             |
| Ancelin, 2016               | 1997-2007     | France      | 47·8                    | Prospective cohort   | 47·8    | 11·4                                   | 282                 | 9                   | 7             |
| Lee, 2016                   | 2006-2013     | Korea       | 49·0                    | Retrospective cohort | 60·7    | 2·0                                    | 258                 | 6                   | 7             |

| Author, year of publication | Year of study | Country           | Mean/median age (years) | Study design               | % Males | Mean/median follow-up duration (years) | No. of participants | No. of dislocations | Study quality |
|-----------------------------|---------------|-------------------|-------------------------|----------------------------|---------|----------------------------------------|---------------------|---------------------|---------------|
| Sing, 2016                  | 2005-2012     | USA               | <65-85+                 | Retrospective cohort       | 38.0    | 2.0                                    | 598 995             | 14 395              | 8             |
| Blizzard, 2016              | 2005-2012     | USA               | <65-85+                 | Retrospective cohort       | 38.9    | 1.0                                    | 71 4654             | 20 551              | 7             |
| Menendez, 2016              | 2002-2011     | USA               | 65.9                    | Retrospective cohort       | 43.4    | 5 days                                 | 176 5115            | 2173                | 7             |
| Malek, 2016                 | 2010-2014     | UK                | 70.5                    | Retrospective cohort       | 45.3    | 1.5                                    | 452                 | 2                   | 7             |
| Tripuraneni, 2016           | 2012-2015     | USA               | 60.2                    | Retrospective cohort       | 39.4    | 1.1                                    | 132                 | 3                   | 6             |
| Wagner, 2016                | 1985-2012     | USA               | 66.0                    | Prospective cohort         | 47.0    | 0.5                                    | 21 361              | 340                 | 8             |
| Hernigou, 2016              | 1990-2000     | France            | 72.5                    | Case-control               | 39.1    | 14.0                                   | 430                 | 36                  | 6             |
| Homma, 2016                 | 2011-2015     | Japan             | 74.8                    | Retrospective cohort       | 16.5    | 0.5                                    | 120                 | 1                   | 7             |
| Opperer, 2016               | 2005-2014     | USA               | 68.9                    | Retrospective cohort       | 48.6    | 1.5                                    | 148                 | 37                  | 8             |
| Garcia-Rey, 2016            | 1992-2012     | Spain             | 60.1                    | Retrospective cohort       | 55.6    | 2.22                                   | 1414                | 38                  | 8             |
| Surace, 2016                | 2005-2008     | Italy             | 66.0                    | Retrospective cohort       | 45.8    | 3.5                                    | 387                 | 6                   | 5             |
| Haughom, 2016               | 2002-2012     | USA               | 63.1                    | Retrospective cohort       | 52.3    | 10.0                                   | 501                 | 14                  | 6             |
| Fujishiro, 2016             | 2005-2010     | Japan             | 62.5                    | Retrospective cohort       | 16.5    | 4.4                                    | 1555                | 50                  | 7             |
| Abdel, 2016                 | 2003-2012     | USA               | 63.0                    | Retrospective cohort       | 37.0    | 2.3                                    | 9784                | 206                 | 6             |
| Spaans, 2015                | 2010-2011     | Netherlands       | 69.9                    | Retrospective cohort       | 15.1    | 1.0                                    | 465                 | 8                   | 7             |
| Pitto, 2015                 | 1999-2012     | New Zealand       | 69.0                    | Prospective cohort         | 47.0    | 7.0                                    | 73 386              | 867                 | 8             |
| Epinette, 2015              | 2007-2011     | France            | 68.2                    | Prospective cohort         | 39.0    | 4.1                                    | 273                 | 7                   | 8             |
| Jamsen, 2015                | 1998-2009     | Finland           | NR                      | Prospective cohort         | NR      | 4.2                                    | 1780                | 137                 | 6             |
| Tsukada, 2015               | 2006-2009     | Japan             | 63.9                    | Retrospective cohort       | 13.9    | 7.5                                    | 316                 | 7                   | 6             |
| Sheth, 2015                 | 2001-2011     | USA               | 66.0                    | Retrospective cohort       | 42.0    | 3.0                                    | 42 438              | 276                 | 8             |
| Maisongrosse, 2015          | 2004-2012     | France            | 76.8                    | Retrospective cohort       | 29.2    | 4.9                                    | 502                 | 2                   | 7             |
| Sanz-Reig, 2015             | 2005-2007     | Spain             | 68.9                    | Retrospective cohort       | 40.7    | 6.8                                    | 454                 | 22                  | 7             |
| Esposito, 2015              | 2007-2012     | USA               | 66.0                    | Prospective cohort         | 42.3    | 0.5                                    | 7040                | 147                 | 8             |
| Delaunay, 2014              | 1988-2000     | France            | 66.0                    | Retrospective cohort       | 56.4    | 9.8                                    | 193                 | 11                  | 7             |
| Insull, 2014                | 1999-2012     | New Zealand       | NR                      | Prospective cohort         | NR      | NR                                     | 12 116              | 88                  | 7             |
| Kaneko, 2014                | 2008          | Japan             | 65.2                    | Retrospective cohort       | 17.0    | 35.4 days                              | 8321                | 117                 | 7             |
| Rathod, 2014***             | 2006-2011     | USA               | 61.5                    | Retrospective cohort       | 44.0    | 1.9                                    | 675                 | 3                   | 7             |
| Amlie, 2014                 | 2008-2010     | Norway            | 66.3                    | Retrospective cohort       | 34.4    | 2.4                                    | 1273                | 39                  | 8             |
| Caton, 2014                 | 2000-2002     | France            | 73.2                    | Retrospective cohort       | 42.5    | 10.0                                   | 320                 | 27                  | 7             |
| Jamsen, 2014***             | 1998-2009     | Finland           | NR                      | Retrospective case control | NR      | 6.0                                    | 1188                | NR                  | 8             |
| Rodriguez, 2014             | 2010          | USA               | 59.5                    | Prospective cohort         | 45.0    | 1.0                                    | 120                 | 1                   | 7             |
| Gerhardt, 2014              | 2008-2011     | Netherlands       | 65.0                    | Retrospective cohort       | 45.8    | 1.0                                    | 190                 | 8                   | 6             |
| Ravi, 2014c                 | 2002-2009     | Canada            | 68.0                    | Retrospective cohort       | 45.2    | 2.0                                    | 43 997              | 569                 | 8             |
| Jameson, 2014               | NR            | UK                | 69.1                    | Retrospective cohort       | 42.7    | 1.0                                    | 37 593              | 55                  | 7             |
| Jorgensen, 2014             | 2010-2011     | Denmark           | 70.0                    | Retrospective cohort       | 45.9    | 90 days                                | 2734                | 65                  | 7             |
| Bergh, 2014                 | 1995-2011     | Denmark, Finland, | 68.9                    | Retrospective cohort       | 40.6    | 6.3                                    | 427 806             | 4222                | 8             |

| Author, year of publication | Year of study | Country        | Mean/median age (years) | Study design               | % Males | Mean/median follow-up duration (years) | No. of participants | No. of dislocations | Study quality |
|-----------------------------|---------------|----------------|-------------------------|----------------------------|---------|----------------------------------------|---------------------|---------------------|---------------|
|                             |               | Norway, Sweden |                         |                            |         |                                        |                     |                     |               |
| Ravi, 2014                  | 2002-2009     | Canada         | 68.0                    | Retrospective cohort       | 46.1    | 2.0                                    | 37 881              | 458                 | 8             |
| Prietzl, 2014               | 2002-2009     | Germany        | NR                      | Retrospective cohort       | NR      | 2.8-6.1                                | 1972                | 28                  | 8             |
| Nakashima, 2014             | 2006-2011     | Japan          | 63.4                    | Retrospective cohort       | 16.8    | 2.5                                    | 634                 | 11                  | 8             |
| Kostensalo, 2013            | 1996-2010     | Finland        | 18-100                  | Prospective cohort         | 43.7    | 10.0                                   | 42 379              | 472                 | 8             |
| Stroh, 2013                 | 2001-2010     | USA            | 54.0                    | Retrospective cohort       | 46.6    | 5.0                                    | 807                 | 10                  | 6             |
| Barrett, 2013               | 2010-2011     | USA            | 62.3                    | RCT                        | 55.2    | 1.0                                    | 87                  | 1                   | NA            |
| Leichtle, 2013***           | 1984-2005     | Germany        | NR                      | Retrospective case control | 50.5    | NR                                     | 111                 | 56                  | 6             |
| Lachiewicz, 2013            | 2001-2006     | USA            | 78.0                    | Prospective cohort         | 31.3    | 6.5                                    | 122                 | NR                  | 6             |
| Martin, 2013                | 2005-2010     | USA            | 59.8                    | Retrospective cohort       | 40.0    | 0.5                                    | 88                  | 4                   | 7             |
| Inacio, 2013                | 2001-2010     | USA            | 65.7                    | Prospective cohort         | 42.5    | 3.0                                    | 35 140              | 307                 | 8             |
| Hailer, 2012                | 2005-2010     | Sweden         | <50->75*                | Retrospective cohort       | 40.0    | 2.7                                    | 78 098              | 399                 | 7             |
| Lindgren, 2012              | 1992-2009     | Sweden         | 70-73                   | Retrospective cohort       | 39.6    | 5.7                                    | 90 662              | 656                 | 8             |
| Howie, 2012                 | 2001-2007     | Australia      | 72.3                    | RCT                        | 41.3    | 1.0                                    | 533                 | 14                  | NA            |
| Zhang, 2012***              | 1991-2006     | China          | 62.2                    | Retrospective cohort       | NR      | 12.8                                   | 307                 | 12                  | 6             |
| Davis, 2011                 | 1998-2005     | UK             | 69.0                    | Prospective cohort         | 38.5    | 5.0                                    | 1617                | 42                  | 8             |
| Lazarinis, 2011             | 1992-2009     | Sweden         | NR                      | Retrospective cohort       | 49.0    | 10.0                                   | 4772                | 8                   | 8             |
| Molli, 2011                 | 1996-2006     | USA            | 61.6                    | Retrospective cohort       | 47.0    | 3.8                                    | 2368                | 5                   | 6             |
| Edmunds, 2011               | 1990-2008     | UK             | 65.7-68.9               | Retrospective cohort       | 35.0    | 1.0                                    | 3416                | 67                  | 6             |
| Clement, 2011               | 2006-2008     | UK             | 68.1                    | Prospective cohort         | NR      | 1.0                                    | 1359                | 29                  | 8             |
| Peter, 2011                 | 1996-2008     | Switzerland    | 70.6                    | Prospective cohort         | 44.4    | 1.0                                    | 2734                | 50                  | 8             |
| Bouchet, 2011               | 2003-2007     | France         | 75.4                    | Retrospective cohort       | 45.5    | 4.3                                    | 213                 | 5                   | 6             |
| Makela, 2011***             | 1998-2005     | Finland        | NR                      | Retrospective cohort       | NR      | NR                                     | 30 266              | NR                  | 7             |
| Chee, 2010                  | 1998-2003     | UK             | 63.6                    | Prospective cohort         | 22.6    | 5.0                                    | 110                 | 4                   | 6             |
| Dudda, 2010***              | 1978-2004     | Switzerland    | 70.0                    | Case-control               | 34.0    | 31 days                                | 826                 | 175                 | 7             |
| Krenzel, 2010               | 1987-2008     | USA            | 67.3                    | Retrospective cohort       | 43.9    | 6.6                                    | 3379                | 94                  | 8             |
| Amlie, 2010                 | 2002-2009     | Norway         | 68.5                    | Retrospective cohort       | 25.9    | 0.5-8                                  | 2572                | 53                  | 8             |
| Sohoo, 2010                 | 1995-2005     | USA            | 66.0                    | Retrospective cohort       | 57.0    | 90 days                                | 138 399             | 1930                | 7             |
| Bozic, 2010                 | 2005-2007     | USA            | 74.5                    | Retrospective cohort       | NR      | NR                                     | 57 047              | NR                  | 8             |
| Tarasevicius, 2010          | 2003-2008     | Lithuania      | 69.0                    | RCT                        | NR      | 1.0                                    | 276                 | 10                  | NA            |
| Kim, 2009                   | 2000-2006     | South Korea    | 57.0                    | Retrospective cohort       | 63.4    | 4.8                                    | 1648                | 60                  | 6             |
| Sexton, 2009                | 1999-2007     | Australia      | 68.1                    | Prospective cohort         | 44.5    | 7.0                                    | 110 239             | 862                 | 8             |
| Hooper, 2009                | 1999-2006     | New Zealand    | <55->75*                | Prospective cohort         | NR      | >90 days                               | 42 665              | 514                 | 5             |
| Lubbeke, 2009               | 1998-2007     | Switzerland    | NR                      | Prospective cohort         | NR      | 6 months                               | 2601                | 46                  | 7             |
| Palan, 2009                 | 1999-2002     | UK             | 68.0                    | Prospective cohort         | 37.8    | 5.0                                    | 1089                | 24                  | 6             |

| Author, year of publication | Year of study | Country     | Mean/median age (years) | Study design         | % Males | Mean/median follow-up duration (years) | No. of participants | No. of dislocations | Study quality |
|-----------------------------|---------------|-------------|-------------------------|----------------------|---------|----------------------------------------|---------------------|---------------------|---------------|
| Blom, 2008                  | 1993-1996     | UK          | NR                      | Prospective cohort   | NR      | 8 to 11                                | 1567                | 53                  | 6             |
| Conroy, 2008***             | 1999-2004     | Australia   | NR                      | Prospective cohort   | 46·3    | NR                                     | 65 992              | 531                 | 8             |
| Grant, 2008                 | NR            | USA         | 56·6                    | Retrospective cohort | 100·0   | 1·6                                    | 255                 | 13                  | 8             |
| Andrew, 2008                | 1999-2002     | UK          | 68·1                    | Prospective cohort   | 37·3    | 5·0                                    | 1421                | 24                  | 6             |
| Tsai, 2008                  | 2000-2005     | Taiwan      | 59·9                    | Retrospective cohort | 44·6    | 3·5                                    | 204                 | 9                   | 7             |
| Kim, 2008                   | 1997-2005     | Korea       | 47·6                    | Retrospective cohort | NR      | 1·0                                    | 450                 | 20                  | 6             |
| Sadr, 2008                  | 1997-2004     | Sweden      | 30-80+                  | Retrospective cohort | NR      | 2·0                                    | 2106                | 53                  | 8             |
| Laffosse, 2007              | NR            | France      | 57·3                    | Prospective cohort   | 58·6    | 0·5                                    | 116                 | 2                   | 6             |
| Arthursson, 2007            | 1987-2004     | Norway      | 71-73                   | Prospective cohort   | 29·0    | 5·6-6·0                                | 25 306              | 176                 | 8             |
| Peters, 2007                | 1995-2004     | USA         | 60·0                    | Prospective cohort   | 44·0    | 4·3                                    | 296                 | 4                   | 6             |
| Lubbeke, 2007               | 1996-2005     | Switzerland | 68·6                    | Prospective cohort   | 44·3    | 5·0                                    | 2495                | 53                  | 8             |
| Karrholm 2006               | 1992-2004     | Sweden      | NR                      | Retrospective cohort | NR      | 2·0                                    | 142 000             | 644                 | 8             |
| Tarasevicius, 2006          | NR            | Lithuania   | 70·0                    | RCT                  | 63·6    | 1·0                                    | 33                  | 1                   | NA            |
| Ibrahim, 2005               | 2000-2002     | UK          | 68·1                    | Retrospective cohort | 33·9    | 1·0                                    | 343                 | 3                   | 5             |
| Namba, 2005                 | 2001-2002     | USA         | 65·4                    | Retrospective cohort | 42·4    | 1·0                                    | 1071                | 8                   | 6             |
| Berry, 2005                 | 1969-1999     | USA         | 64·0                    | Prospective cohort   | 48·8    | 9·5-10·5                               | 21 047              | 868                 | 8             |
| Sierra, 2005                | 1992-2002     | USA         | 83·0                    | Retrospective cohort | 42·0    | 2·2                                    | 150                 | 8                   | 8             |
| Zwartele, 2004              | 1996-1999     | Netherlands | 66·9                    | Prospective cohort   | 14·0    | 2·0                                    | 410                 | 17                  | 8             |
| Lawton, 2004                | 1990-1994     | USA         | NR                      | Retrospective cohort | NR      | NR                                     | 250                 | 14                  | 7             |
| Suh, 2004                   | 1993-1998     | South Korea | 53·4                    | Retrospective cohort | 66·3    | 1·0                                    | 346                 | 17                  | 8             |
| Bystrom, 2003               | 1987-2000     | Norway      | 72·0                    | Prospective cohort   | 29·0    | 5·3                                    | 42 987              | 311                 | 8             |
| Weeden, 2003                | 1994-2000     | USA         | 62·3                    | Retrospective cohort | 41·0    | 4·4                                    | 945                 | 8                   | 6             |
| van Stralen, 2003           | 1995-1998     | Netherlands | 69·5                    | Retrospective cohort | 26·0    | 2·5                                    | 884                 | 12                  | 6             |
| Mahomed, 2003               | 1995-1996     | USA         | ≥65*                    | Retrospective cohort | NR      | 90 days                                | 61 568              | 1909                | 8             |
| von Knoch, 2002             | 1969-1995     | USA         | 66·0                    | Retrospective cohort | 48·5    | 11·3                                   | 19 680              | 513                 | 7             |
| Jolles, 2002***             | 1991-1998     | Switzerland | 69·0                    | Retrospective cohort | 42·9    | NR                                     | 42                  | 21                  | 7             |
| Downing, 2001               | 1995-1997     | UK          | 66·0                    | Retrospective cohort | 45·0    | 1·0                                    | 100                 | 4                   | 6             |
| White, 2001                 | NR            | USA         | NR                      | Case-control         | NR      | 0·5                                    | 1515                | 55                  | 5             |
| Katz, 2001                  | 1995-1996     | USA         | 74·3                    | Retrospective cohort | 36·0    | 90 days                                | 58 521              | 1834                | 7             |
| Goldstein, 2001             | 1993-1999     | USA         | NR                      | Retrospective cohort | NR      | 1·0                                    | 1000                | 17                  | 6             |
| Chiu, 2000                  | 1994-1997     | Taiwan      | 52·4                    | RCT                  | 61·7    | 3·2                                    | 180                 | 2                   | NA            |
| Li, 1999                    | 1989-1992     | USA         | 66·0                    | Retrospective cohort | 50·0    | 7·0                                    | 812                 | 24                  | 6             |
| Woolson, 1999               | 1985-1995     | USA         | 64·0                    | Retrospective cohort | 50·2    | 3 months                               | 315                 | 14                  | 7             |
| Mallory, 1999               | 1992-1996     | USA         | 63·0                    | Retrospective cohort | 46·0    | 3·0                                    | 1518                | 12                  | 6             |
| Kelley, 1998                | 1995-1996     |             |                         | RCT                  | 26·7    | 1·0                                    | 31                  | 5                   | NA            |
| Kelley, 1998                | 1984-1994     | USA         | 63·0                    | Retrospective cohort | 32·1    | 5·4                                    | 308                 | 5                   | 7             |



| Author, year of publication | Year of study | Country | Mean/median age (years) | Study design         | % Males | Mean/median follow-up duration (years) | No. of participants | No. of dislocations | Study quality |
|-----------------------------|---------------|---------|-------------------------|----------------------|---------|----------------------------------------|---------------------|---------------------|---------------|
| Pellicci, 1998** (***)      | 1991-1996     | USA     | NR                      | Retrospective cohort | NR      | NR                                     | 284 (790)           | 11 (16)             | 6             |
| Paterno, 1997               | 1983-1994     | USA     | 58·8-61·2               | Retrospective cohort | 32·0    | 5 to 6                                 | 391                 | 17                  | 8             |
| Cobb, 1996                  | 1985-1991     | USA     | NR                      | Retrospective cohort | NR      | 2·0                                    | 4117                | 75                  | 6             |
| Hedlundh, 1996***           | 1979-1991     | Sweden  | 69·3                    | Retrospective cohort | 44·1    | NR                                     | 4230                | 129                 | 8             |
| Lehman, 1994                | 1983-1990     | USA     | 48-52                   | Retrospective cohort | 69·8    | 2·0                                    | 202                 | 6                   | 6             |
| Carlson, 1987               | 1982-1983     | USA     | 65·2                    | Retrospective cohort | 87·8    | 16-17 days                             | 74                  | 5                   | 5             |
| Vicar, 1984                 | 1976-1980     | USA     | 64·8                    | Retrospective cohort | 38·4    | 3·2                                    | 269                 | 9                   | 6             |
| Roberts, 1984               | 1975-1979     | USA     | 60·0                    | Retrospective cohort | 50·0    | 10 weeks                               | 175                 | 5                   | 6             |
| Robinson, 1980              | 1972-1978     | USA     | 61·5                    | Retrospective cohort | 41·4    | 1·6                                    | 316                 | 12                  | 7             |
| Weaver, 1975                | 1969-1973     | USA     | NR                      | Retrospective cohort |         | 2·2-3·5                                | 60                  | 4                   | 5             |

\*, age range of participants; \*\*, based on two studies; \*\*\*, the following studies were not included in incidence rates calculation because the sample was very selected, there was no data on follow-up duration or there was no data on number of dislocation events; NA, not applicable; NR, not reported; RCT, randomised controlled trial

**Appendix 8.** Cochrane risk of bias assessment for randomised controlled trials

|                    | <i>Random sequence generation</i> | <i>Allocation concealment</i> | <i>Blinding of participants &amp; personnel</i> | <i>Blinding of outcome assessments</i> | <i>Incomplete outcome data</i> | <i>Selective reporting</i> | <i>Other bias</i> |
|--------------------|-----------------------------------|-------------------------------|-------------------------------------------------|----------------------------------------|--------------------------------|----------------------------|-------------------|
| Kelly, 1998        | ?                                 | ?                             | -                                               | -                                      | +                              | +                          | -                 |
| Chiu, 2000         | ?                                 | ?                             | -                                               | -                                      | +                              | +                          | -                 |
| Tarasevicius, 2006 | ?                                 | ?                             | -                                               | -                                      | -                              | +                          | -                 |
| Tarasevicius, 2010 | ?                                 | ?                             | -                                               | -                                      | +                              | +                          | -                 |
| Howie, 2012        | +                                 | +                             | -                                               | -                                      | +                              | +                          | ?                 |
| Barrett, 2013      | +                                 | ?                             | -                                               | -                                      | +                              | +                          | ?                 |
| Abdel, 2017        | +                                 | +                             | ?                                               | -                                      | +                              | +                          | ?                 |
| Cheng, 2017        | +                                 | +                             | +                                               | +                                      | +                              | +                          | ?                 |
| Rosenlund, 2017    | +                                 | +                             | +                                               | ?                                      | +                              | +                          | +                 |

|   |                      |
|---|----------------------|
| + | Low risk of bias     |
| ? | Unclear risk of bias |
| - | High risk of bias    |

## Appendix 9. Incidence rate of dislocation across 112 relevant studies

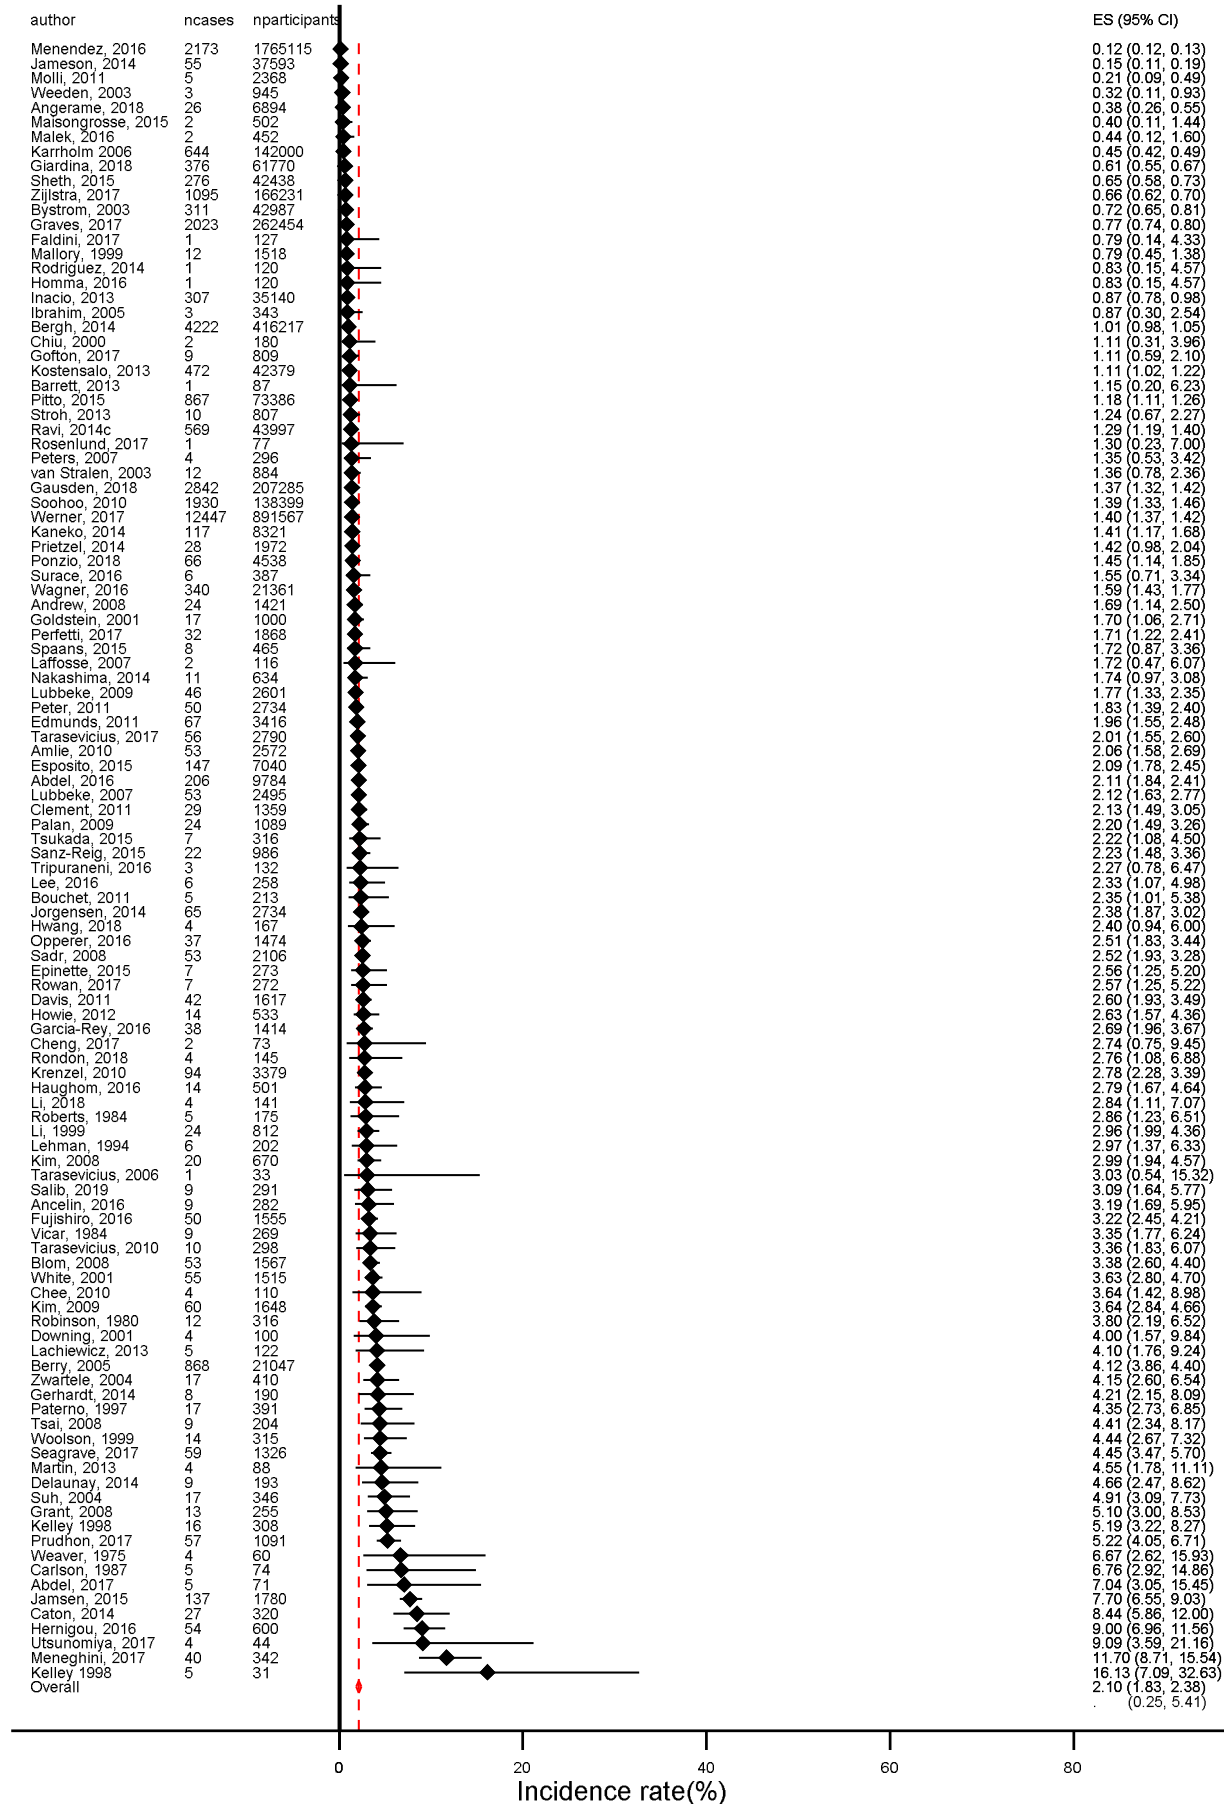

Only unique studies were included in pooled analysis to avoid the potential of double counting

**Appendix 10.** Incidence of dislocation following primary total hip replacement at specific average follow-up periods

(A)

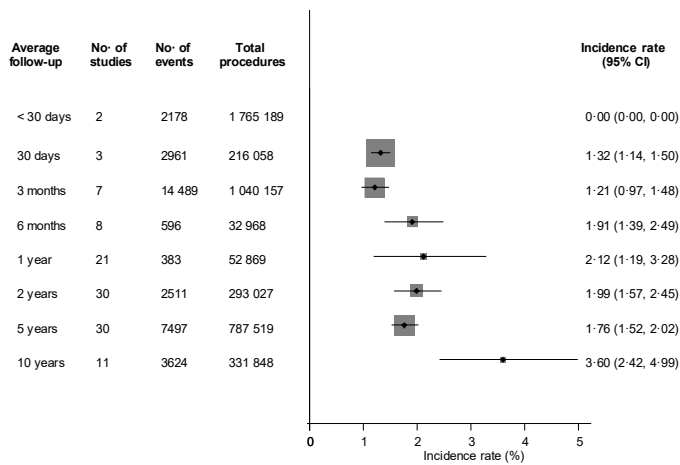

(B)

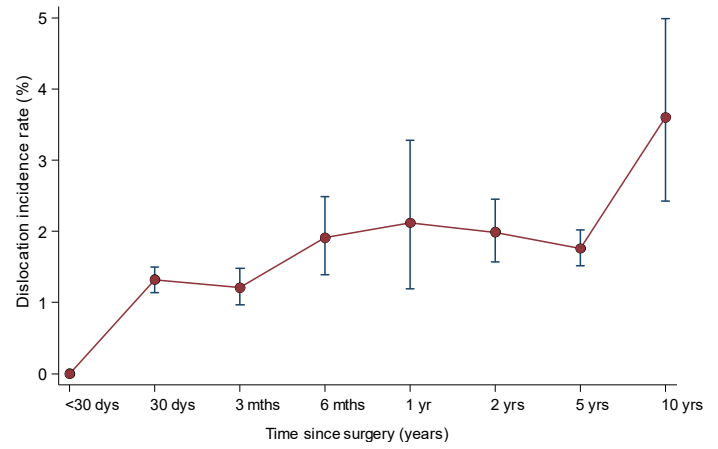

Capped vertical bars represent 95% confidence intervals

**Appendix 11.** Risk of dislocation comparing males to females

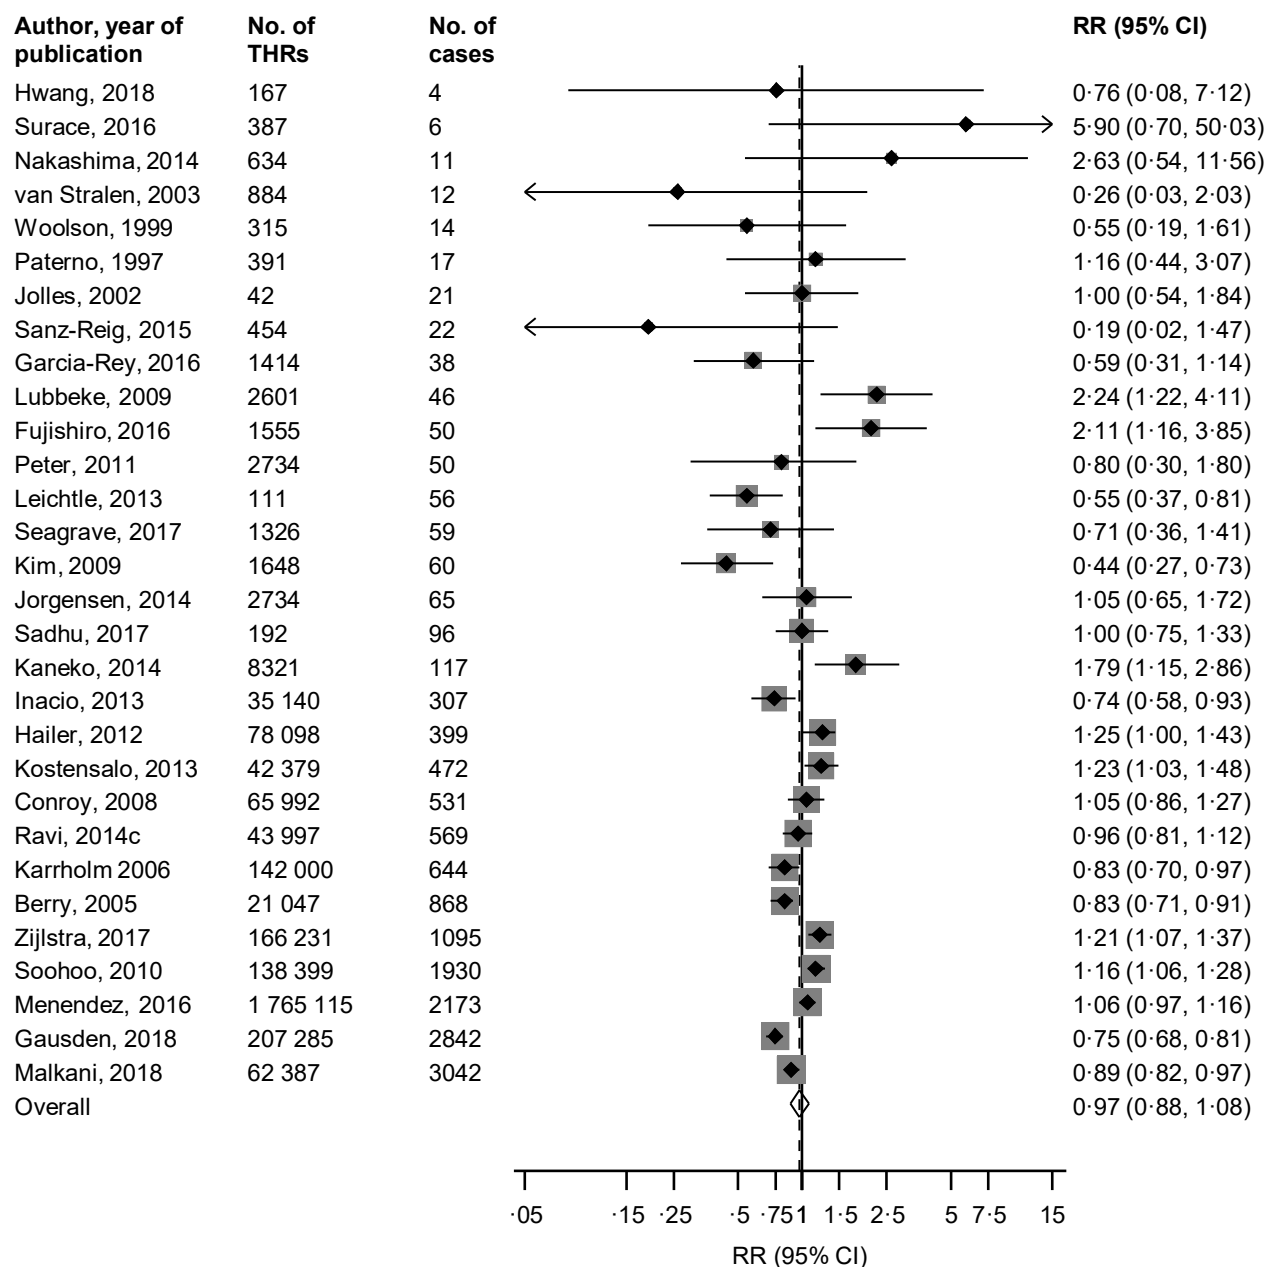

CI, confidence interval (bars); RR, relative risk; THR, total hip replacement

**Appendix 12.** Risk of dislocation comparing males to females, grouped according to study level characteristics

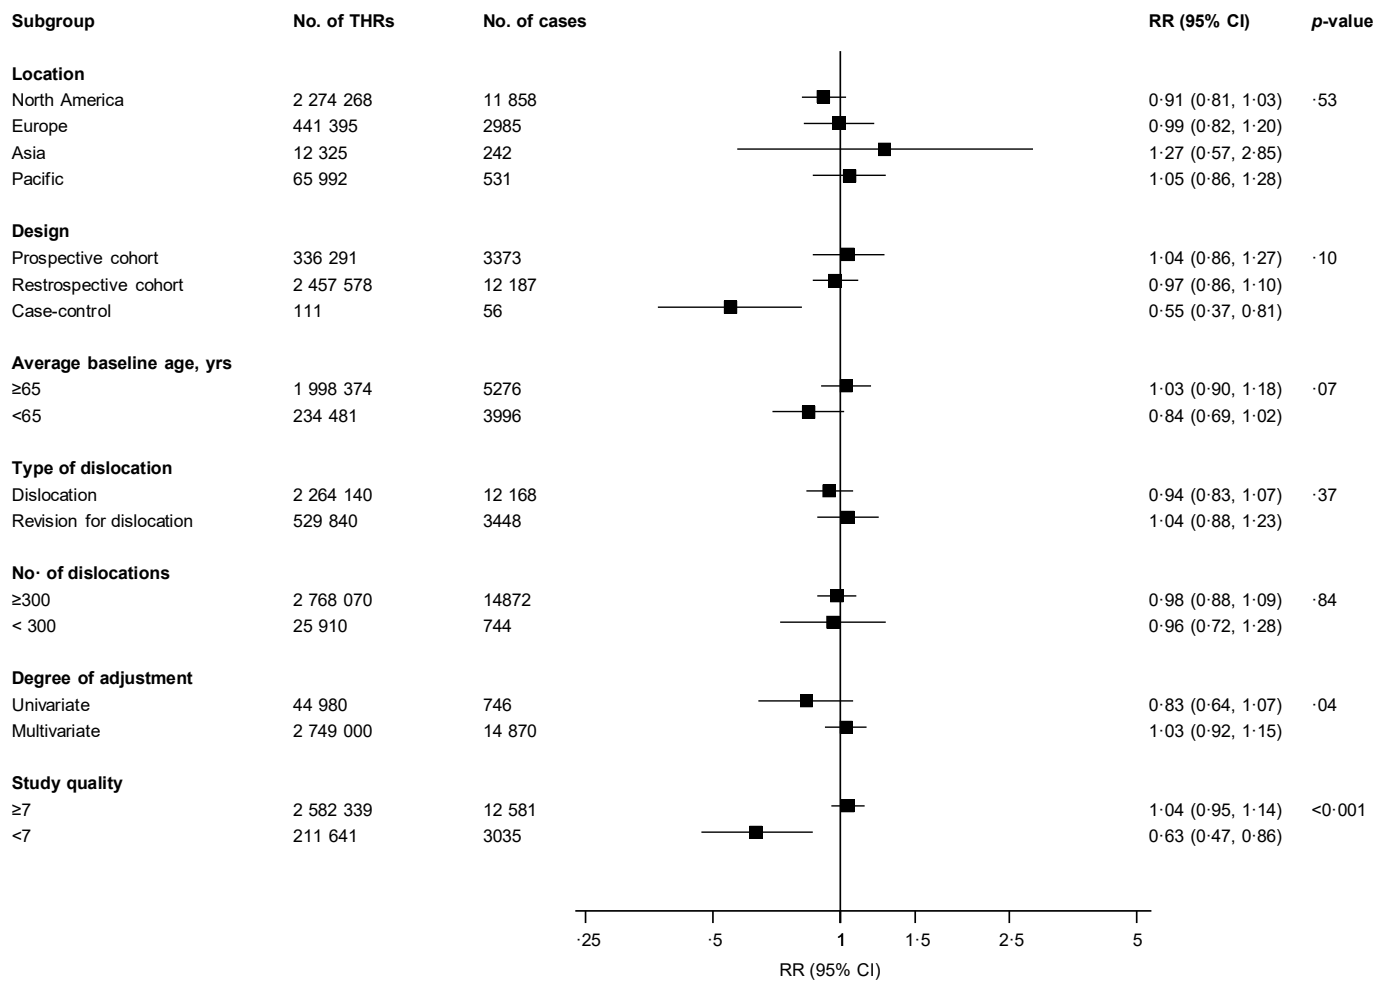

CI, confidence interval (bars); RR, relative risk; p-values are for meta-regression

### Appendix 13. Risk of dislocation for BMI comparisons

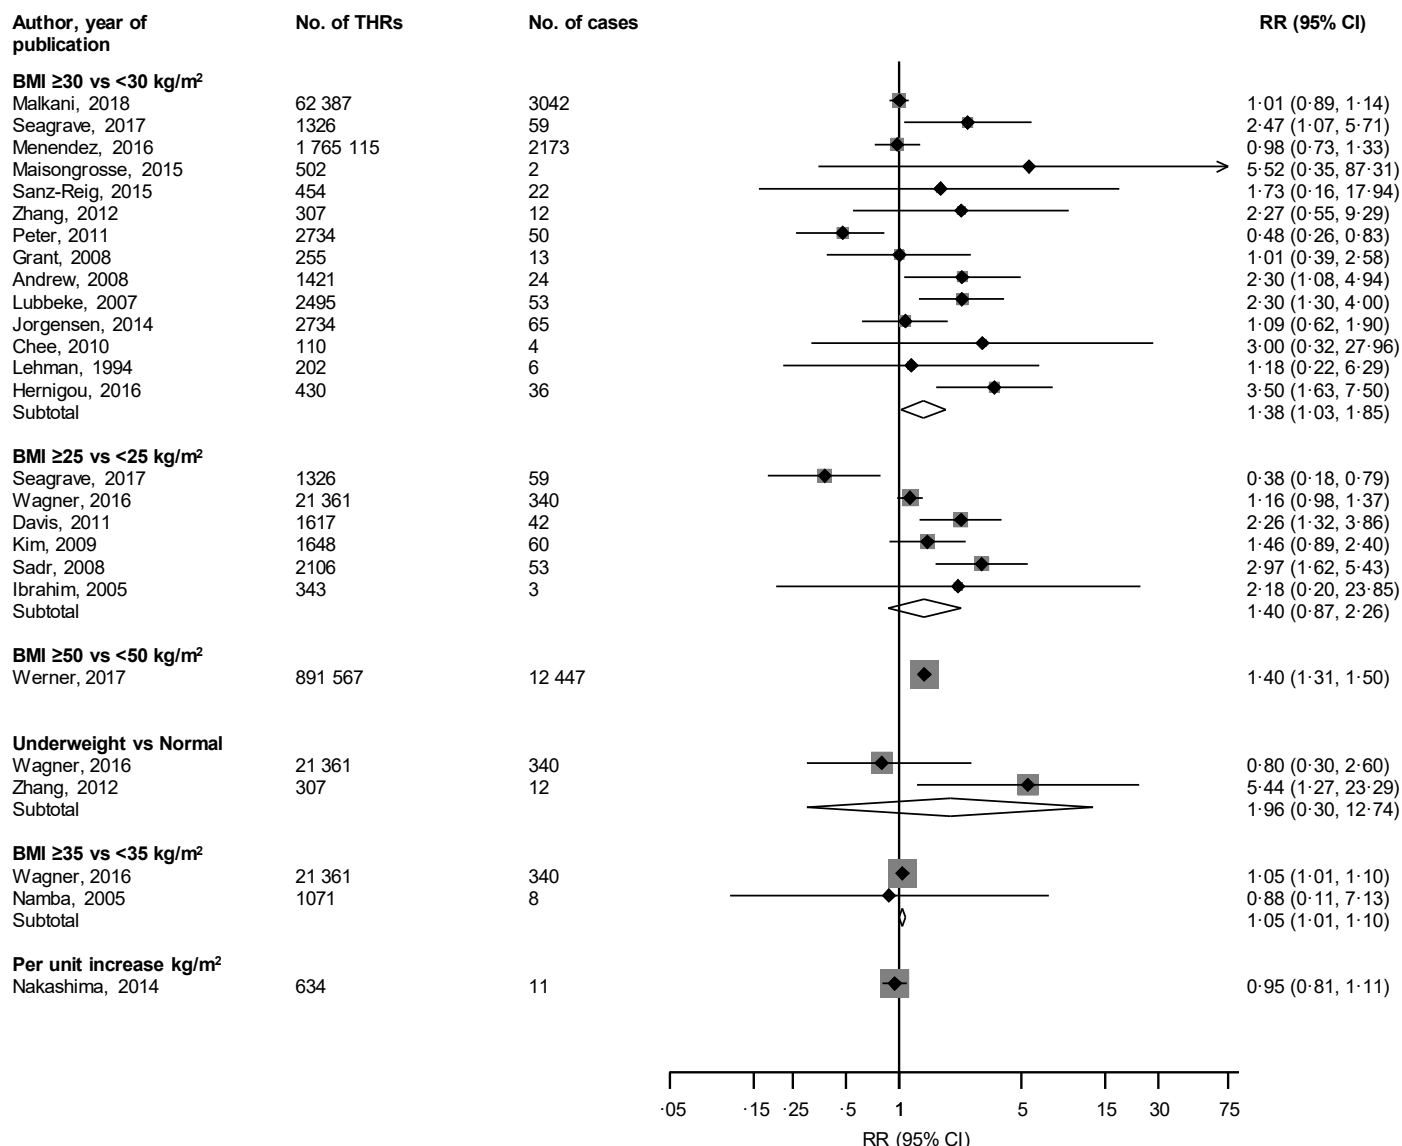

BMI, body mass index; CI, confidence interval (bars); RR, relative risk; THR, total hip replacement

**Appendix 14.** Risk of dislocation comparing individuals with a BMI  $\geq 30$  versus  $<30$  kg/m<sup>2</sup>, grouped according to study level characteristics

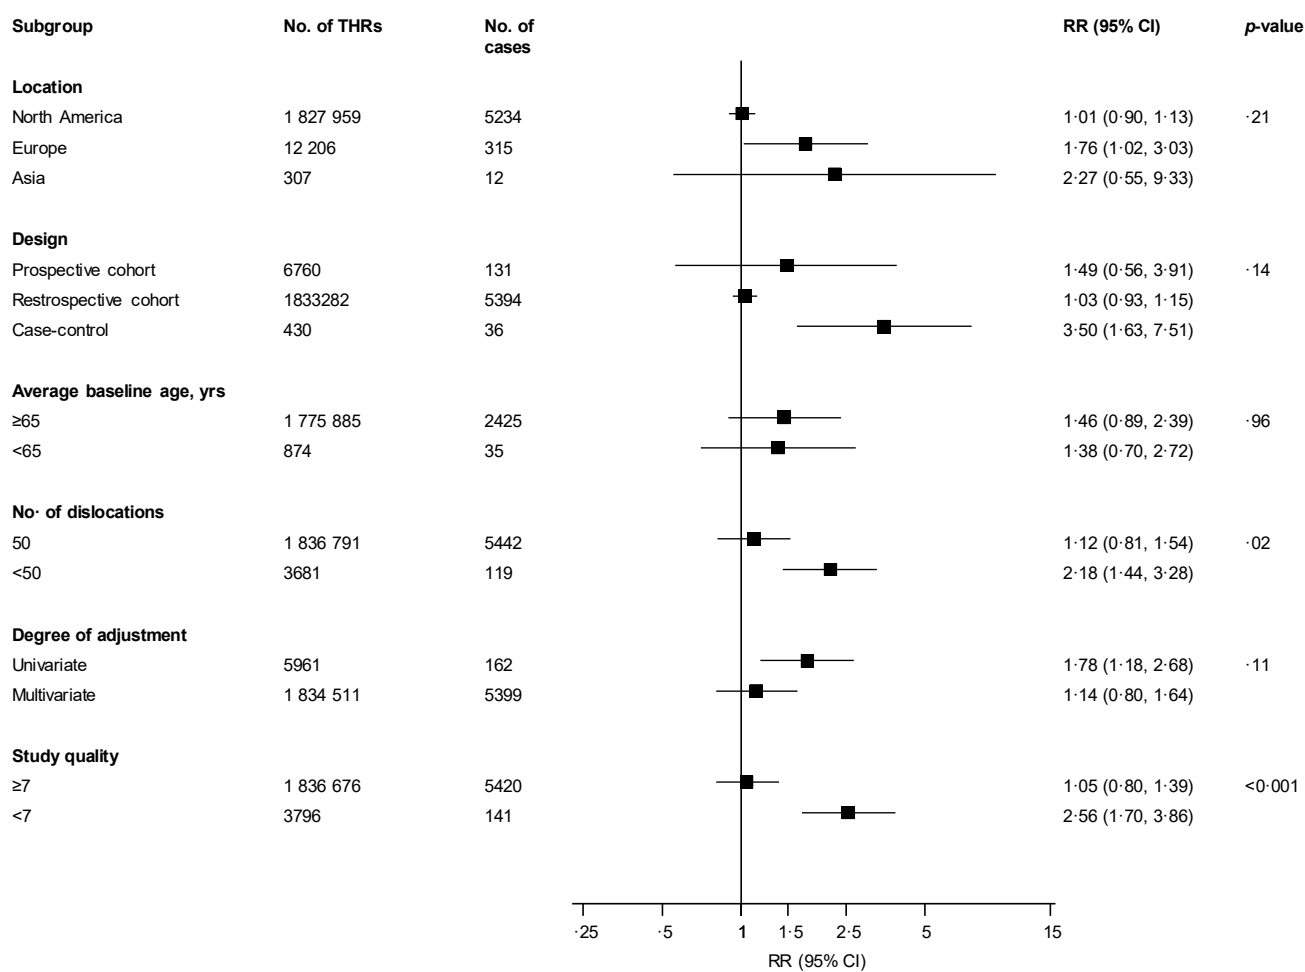

BMI, body mass index; CI, confidence interval (bars); RR, relative risk; THR, total hip replacement; *p*-values are for meta-regression



**Appendix 15.** Risk of dislocation comparing patients with neurological disorder versus no neurological disorder

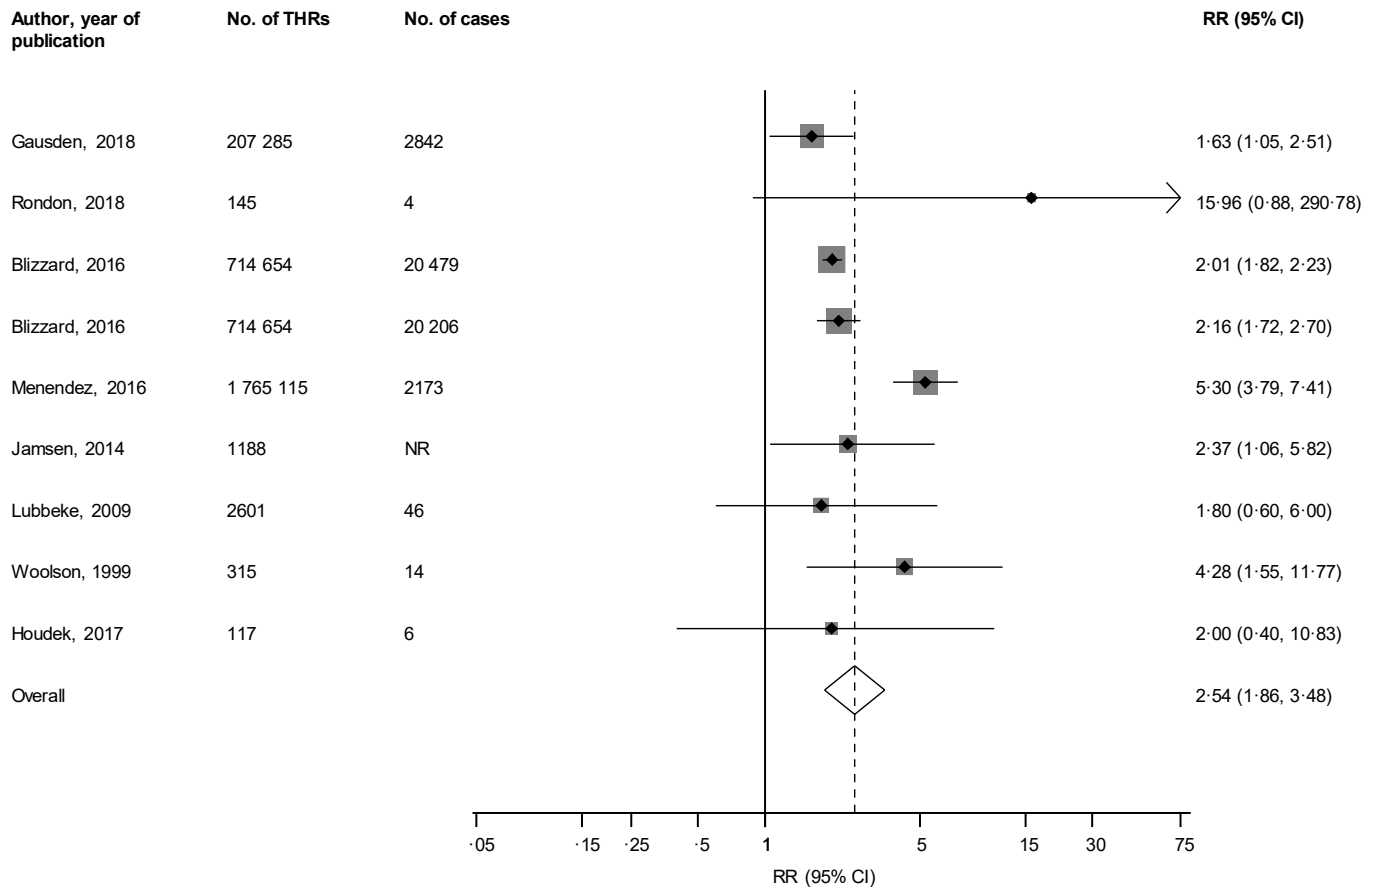

CI, confidence interval (bars); NR, not reported; RR, relative risk; THR, total hip replacement

**Appendix 16.** Risk of dislocation comparing a surgical indication of avascular necrosis versus osteoarthritis

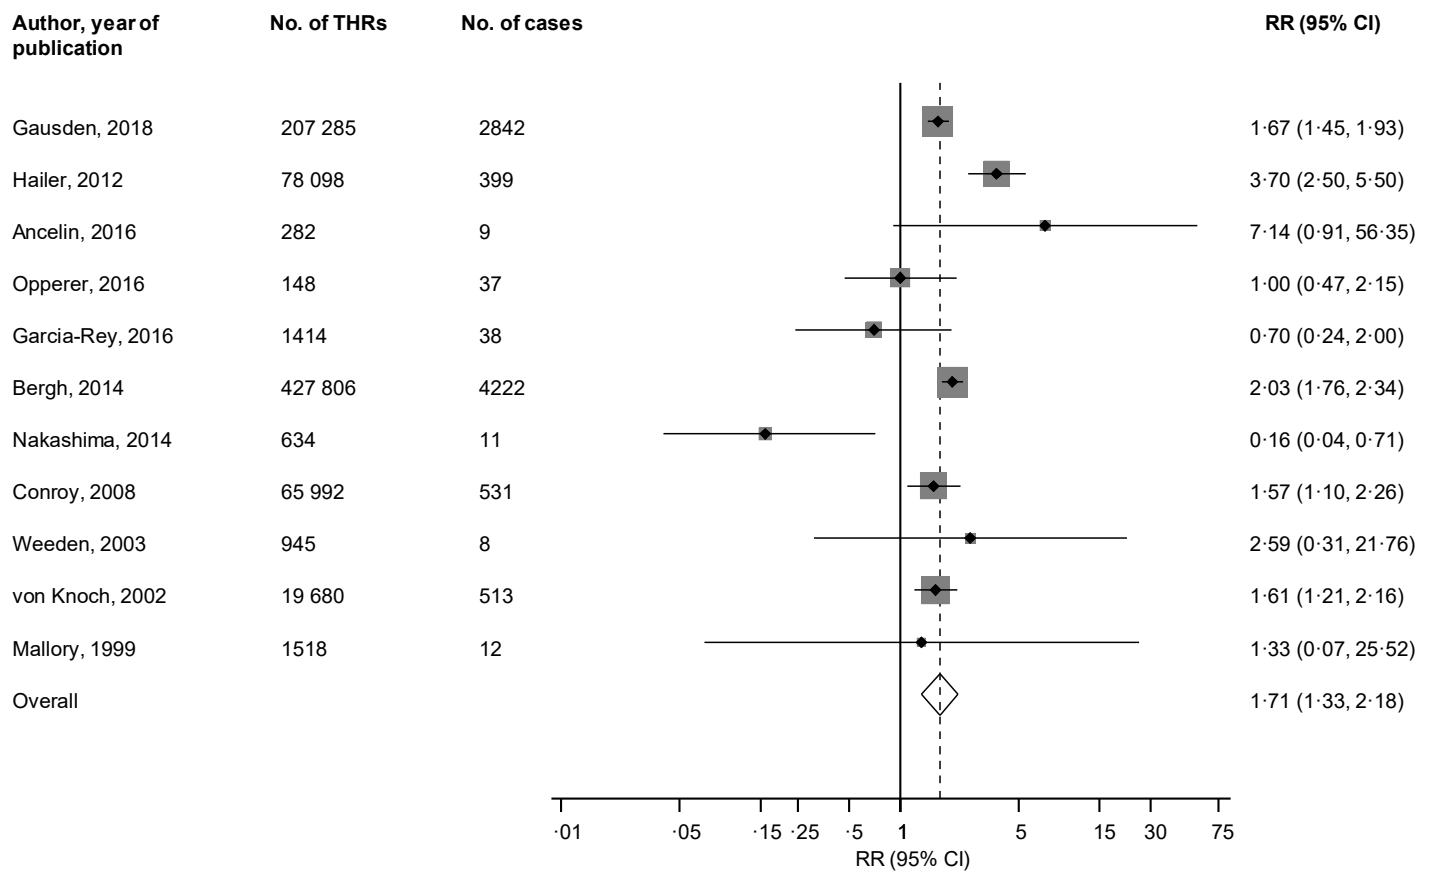

CI, confidence interval (bars); RR, relative risk; THR, total hip replacement

**Appendix 17.** Risk of dislocation comparing a surgical indication of rheumatoid arthritis versus osteoarthritis

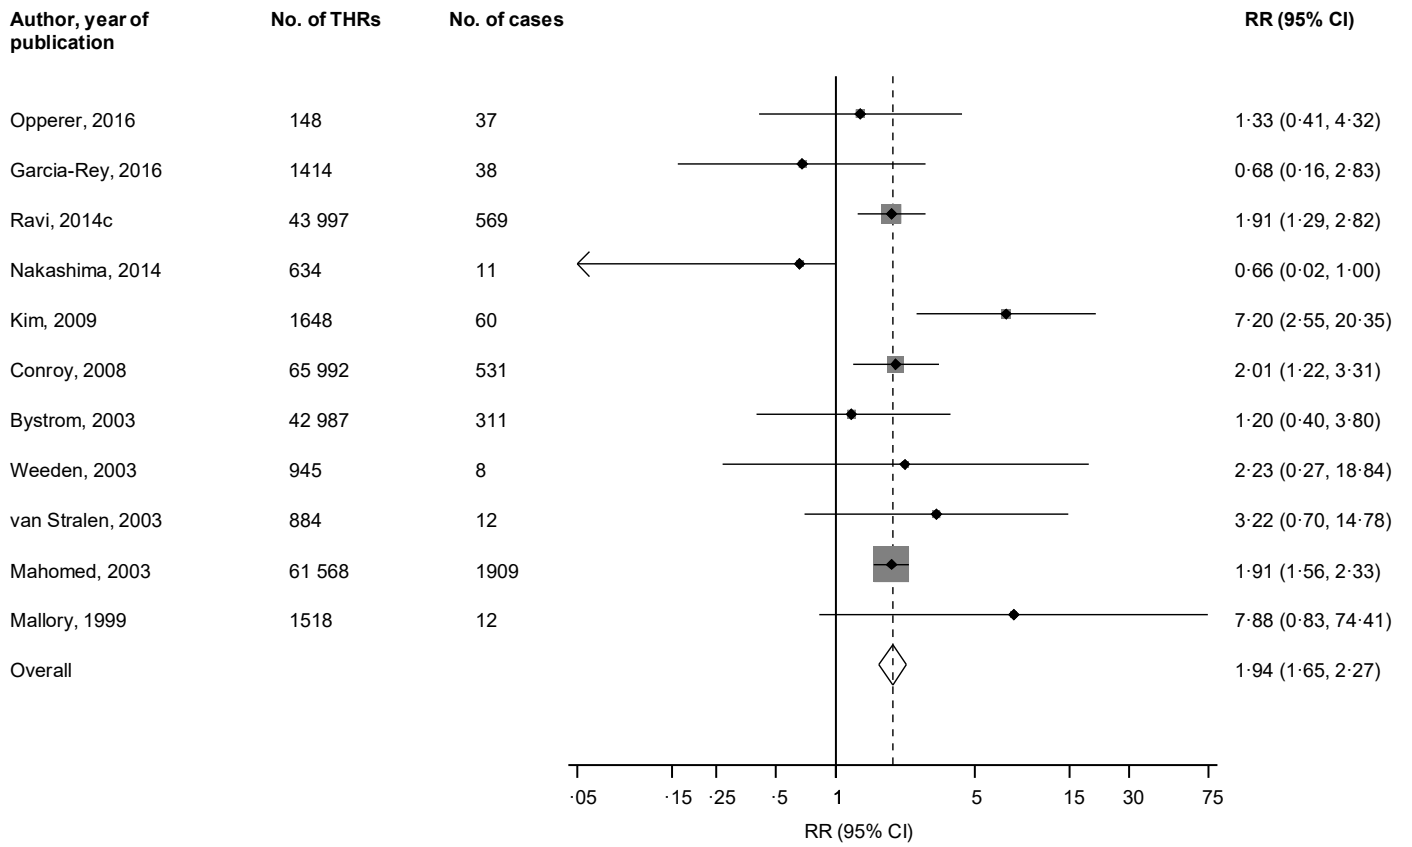

CI, confidence interval (bars); RR, relative risk; THR, total hip replacement

**Appendix 18.** Risk of dislocation comparing a surgical indication of avascular necrosis versus osteoarthritis, grouped according to study level characteristics

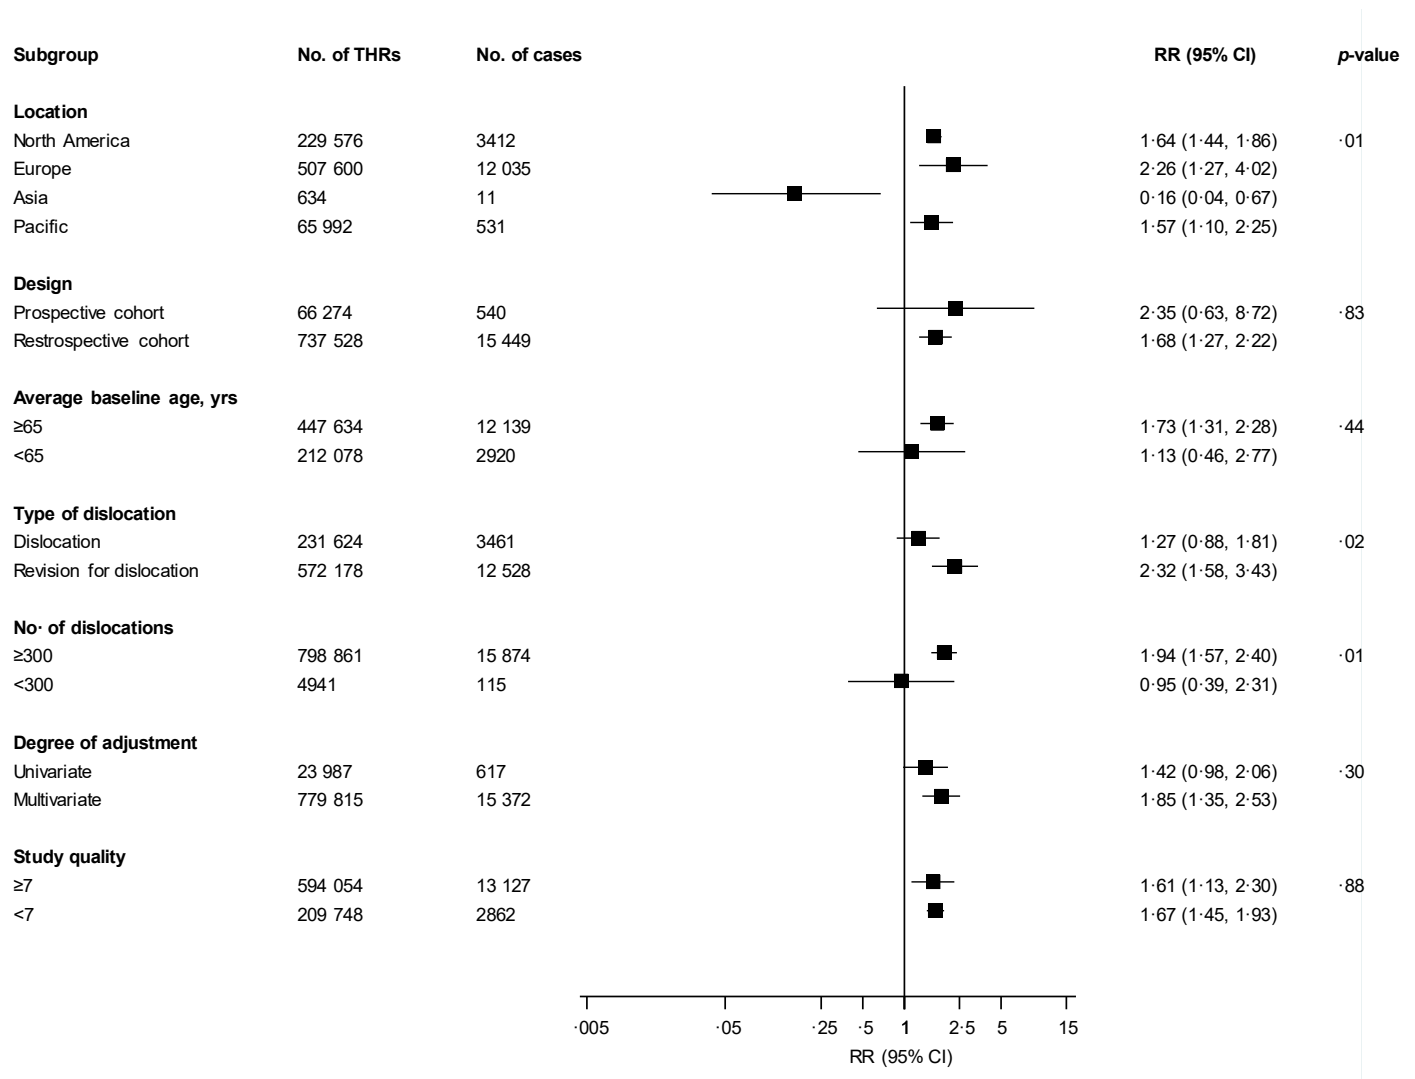

CI, confidence interval (bars); RR, relative risk; THR, total hip replacement; p-values are for meta-regression

## Appendix 19. Risk of dislocation comparing a posterior with an anterolateral approach

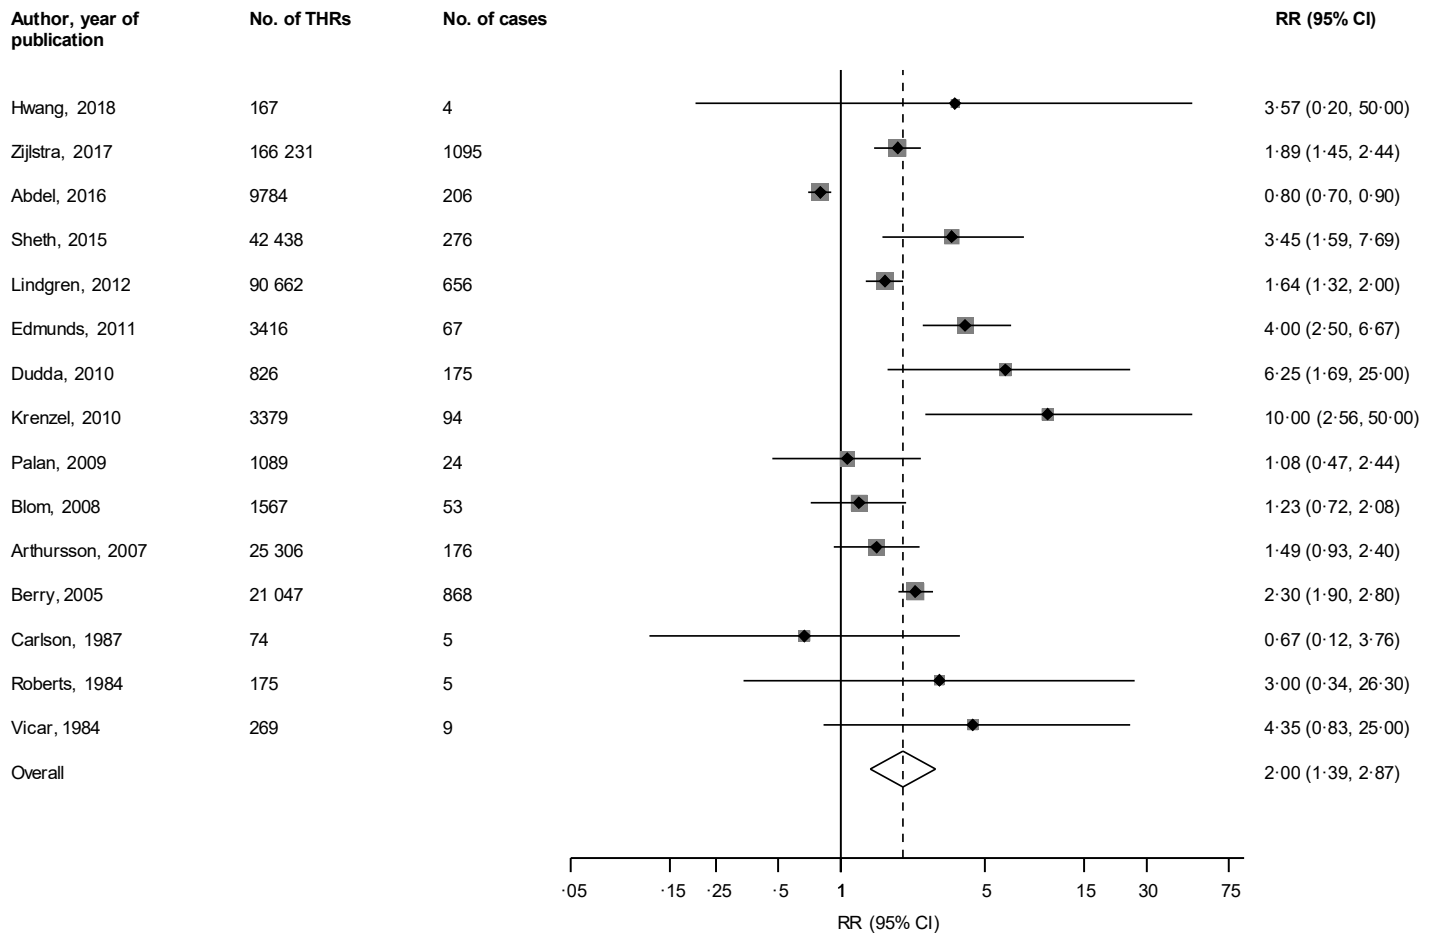

CI, confidence interval (bars); RR, relative risk; THR, total hip replacement

**Appendix 20.** Risk of dislocation comparing a direct anterior with a posterior approach

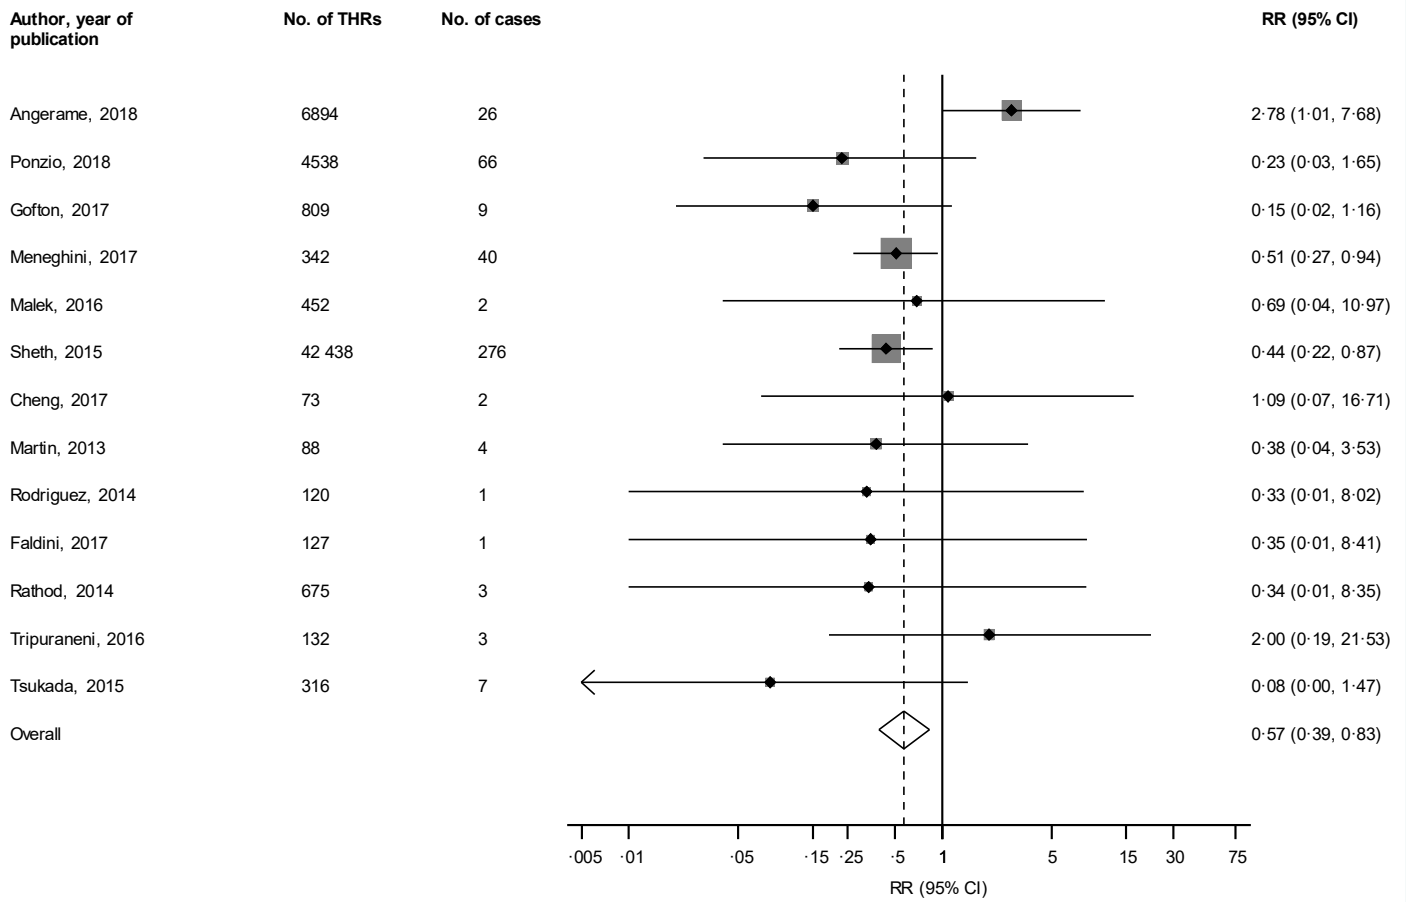

CI, confidence interval (bars); RR, relative risk; THR, total hip replacement

**Appendix 21.** Risk of dislocation comparing a posterior with an anterolateral approach, grouped according to study level characteristics

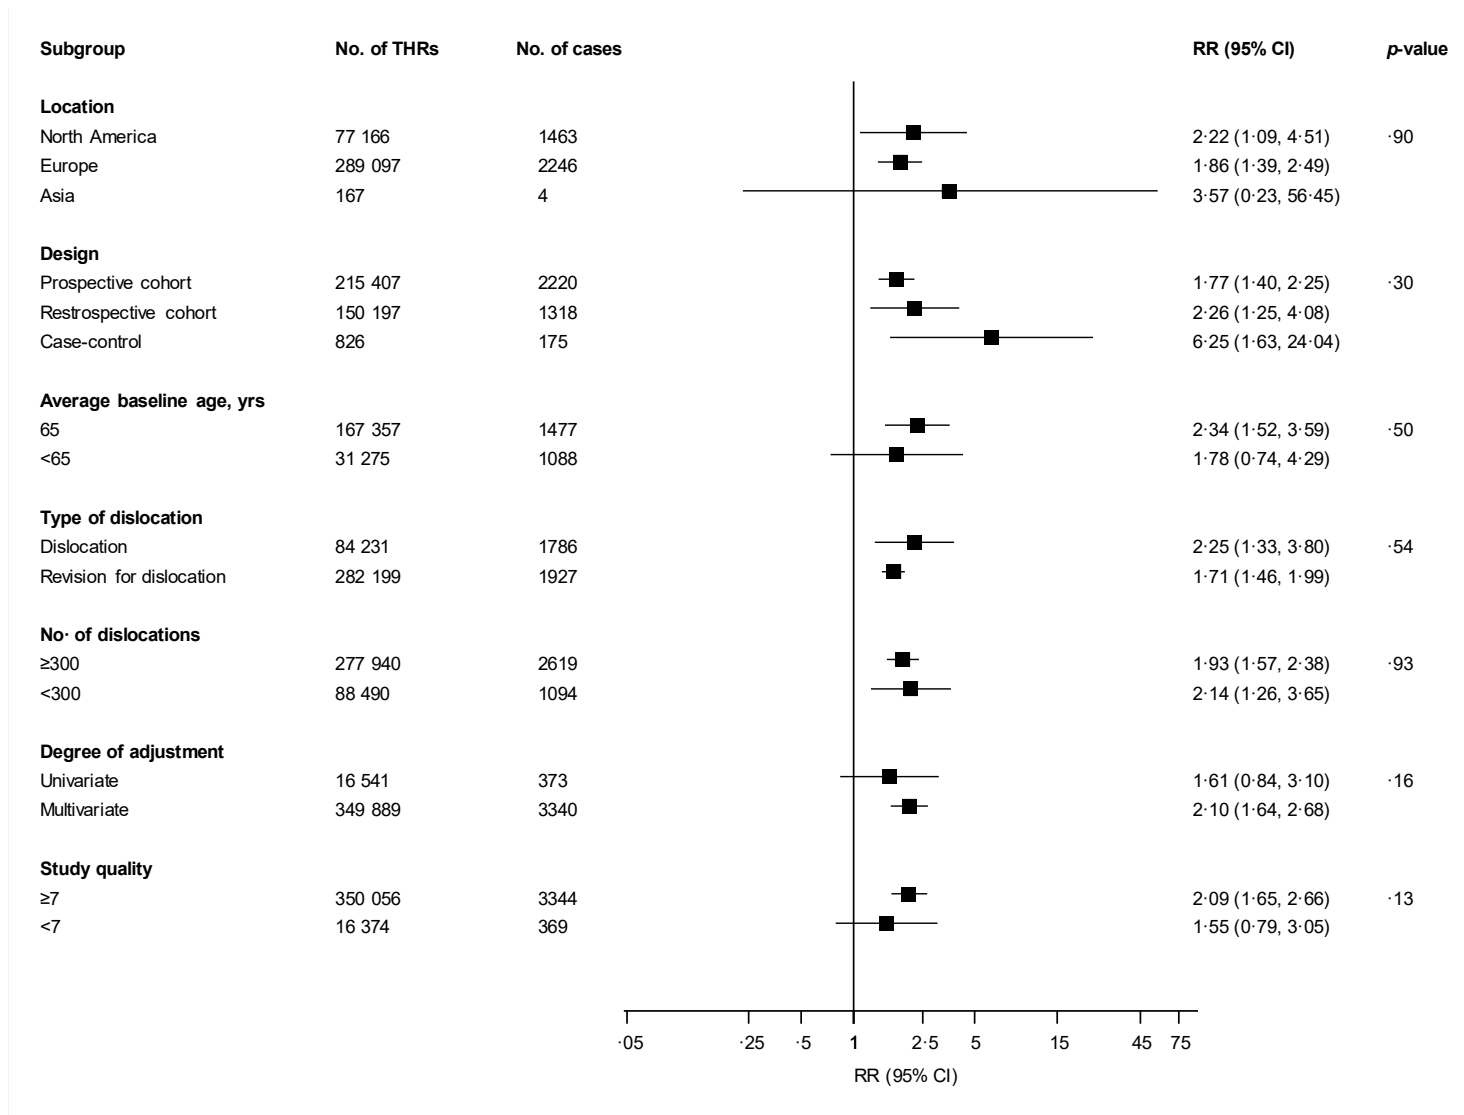

CI, confidence interval (bars); RR, relative risk; THR, total hip replacement; p-values are for meta-regression

## Appendix 22. Summary associations of surgery-related factors and risk of dislocation

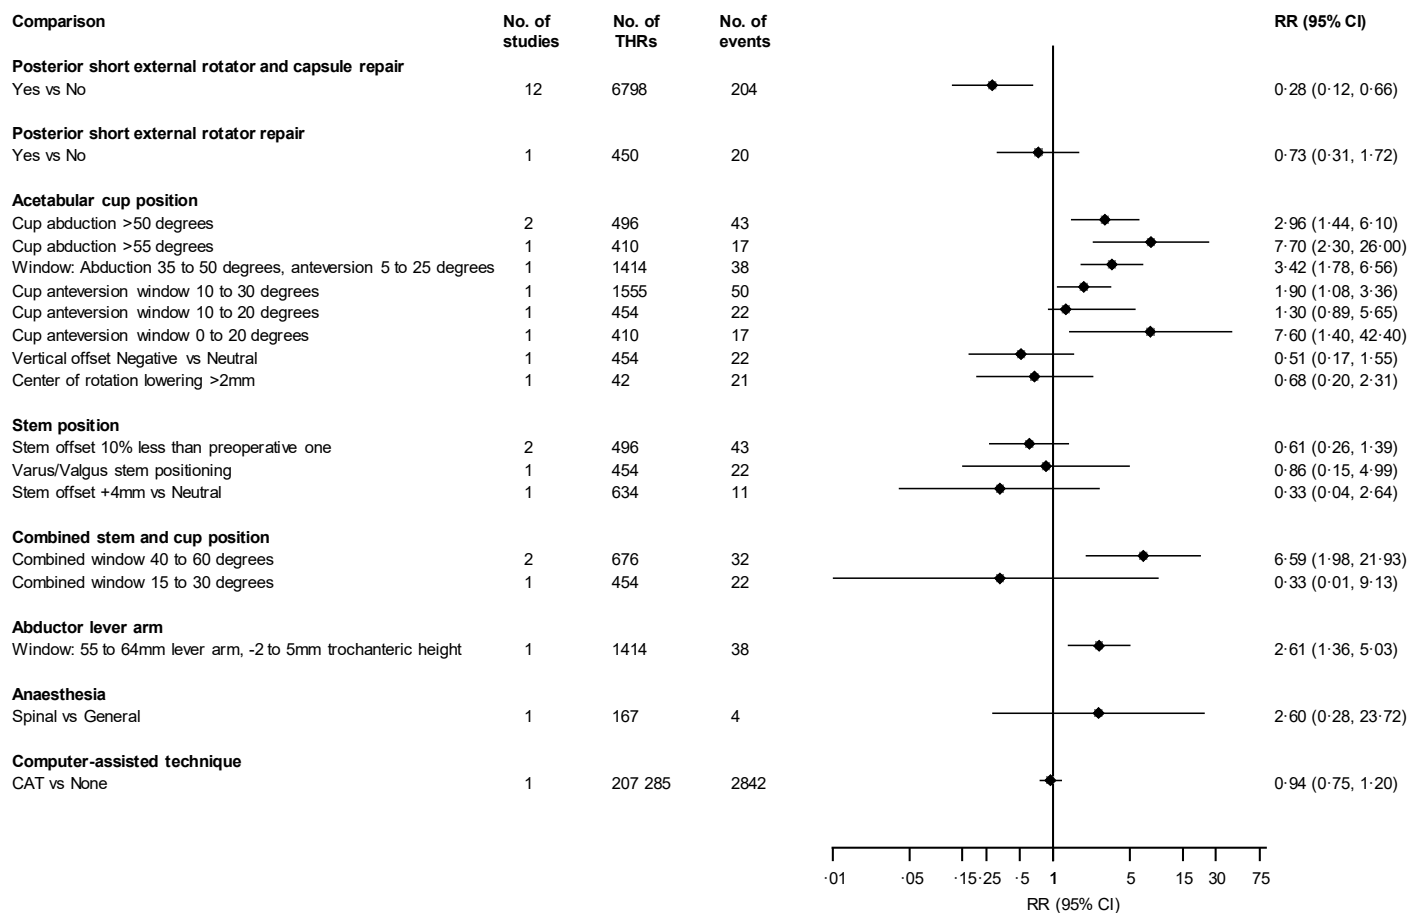

CAT, computer-assisted technique; CI, confidence interval (bars); RR, relative risk; THR, total hip replacement



**Appendix 23.** Risk of dislocation comparing a posterior short external rotator and capsule repair versus none

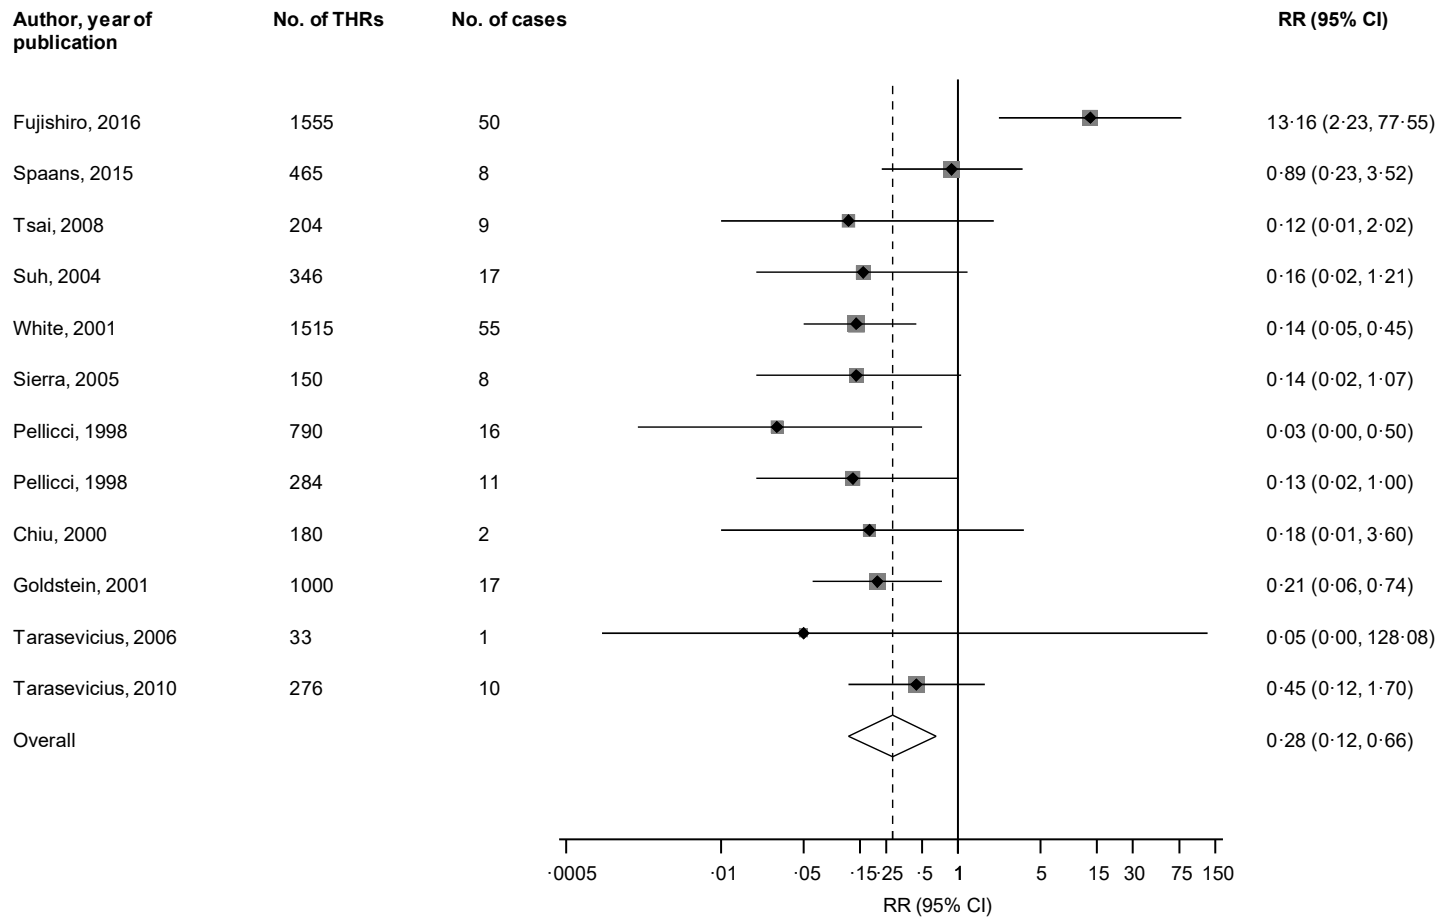

CI, confidence interval (bars); RR, relative risk; THR, total hip replacement

**Appendix 24.** Risk of dislocation comparing a posterior short external rotator and capsule repair versus none, grouped according to study level characteristics

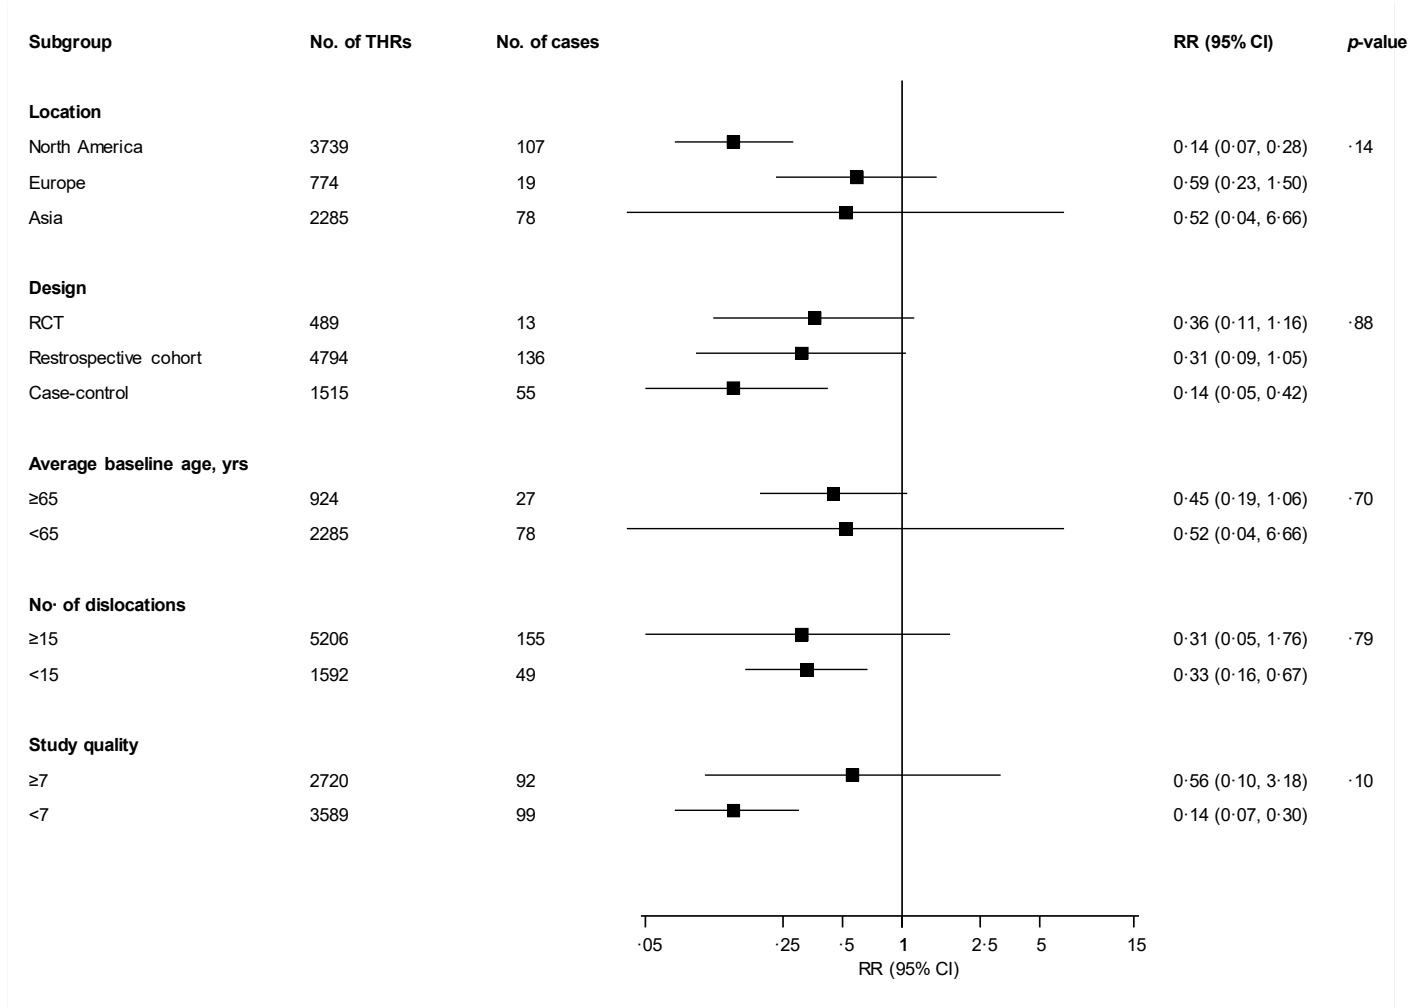

CI, confidence interval (bars); RR, relative risk; p-values are for meta-regression

**Appendix 25.** Summary associations of implant-related factors and risk of dislocation

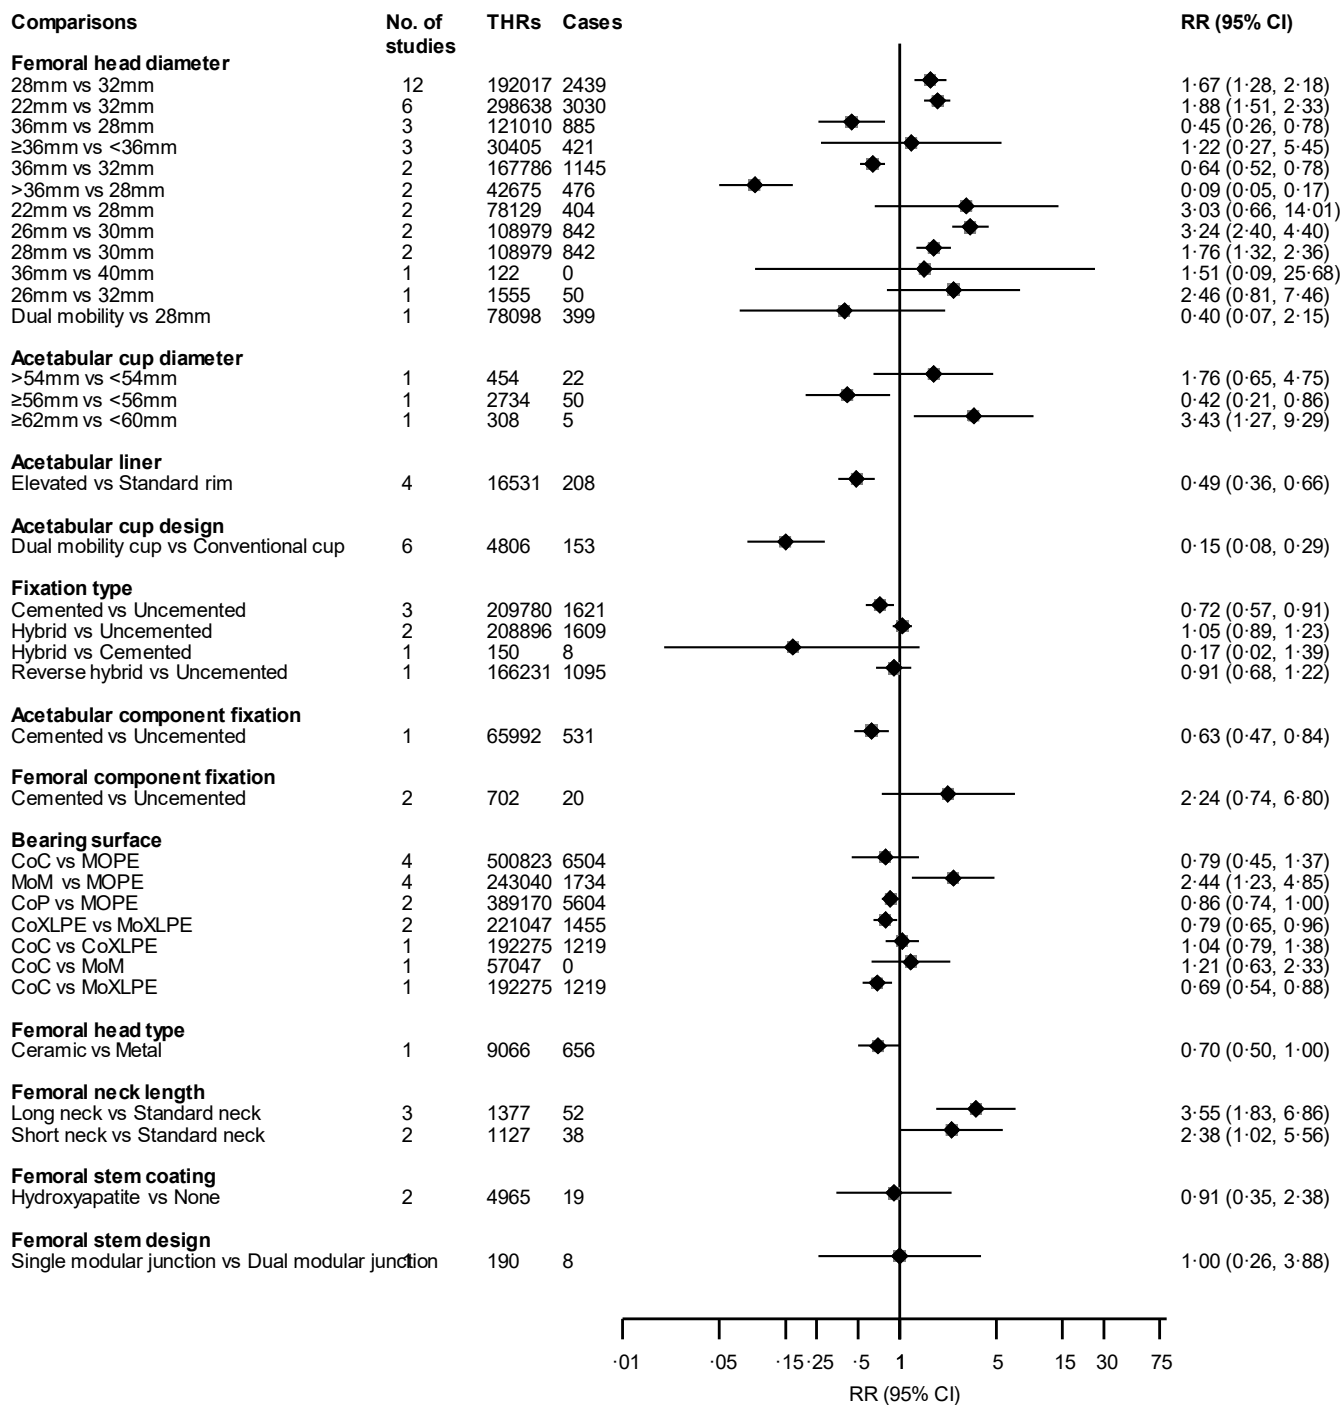

CI, confidence interval (bars); CoC, ceramic-on-ceramic; CoXLPE, ceramic-on-cross-linked polyethylene; MoM, metal-on-metal; MoPE, metal-on-polyethylene; metal-on-cross-linked polyethylene, MoXLPE; RR, relative risk; \*, are number of participants or hip replacements

**Appendix 26.** Risk of dislocation comparing femoral head diameter 28mm versus 32mm

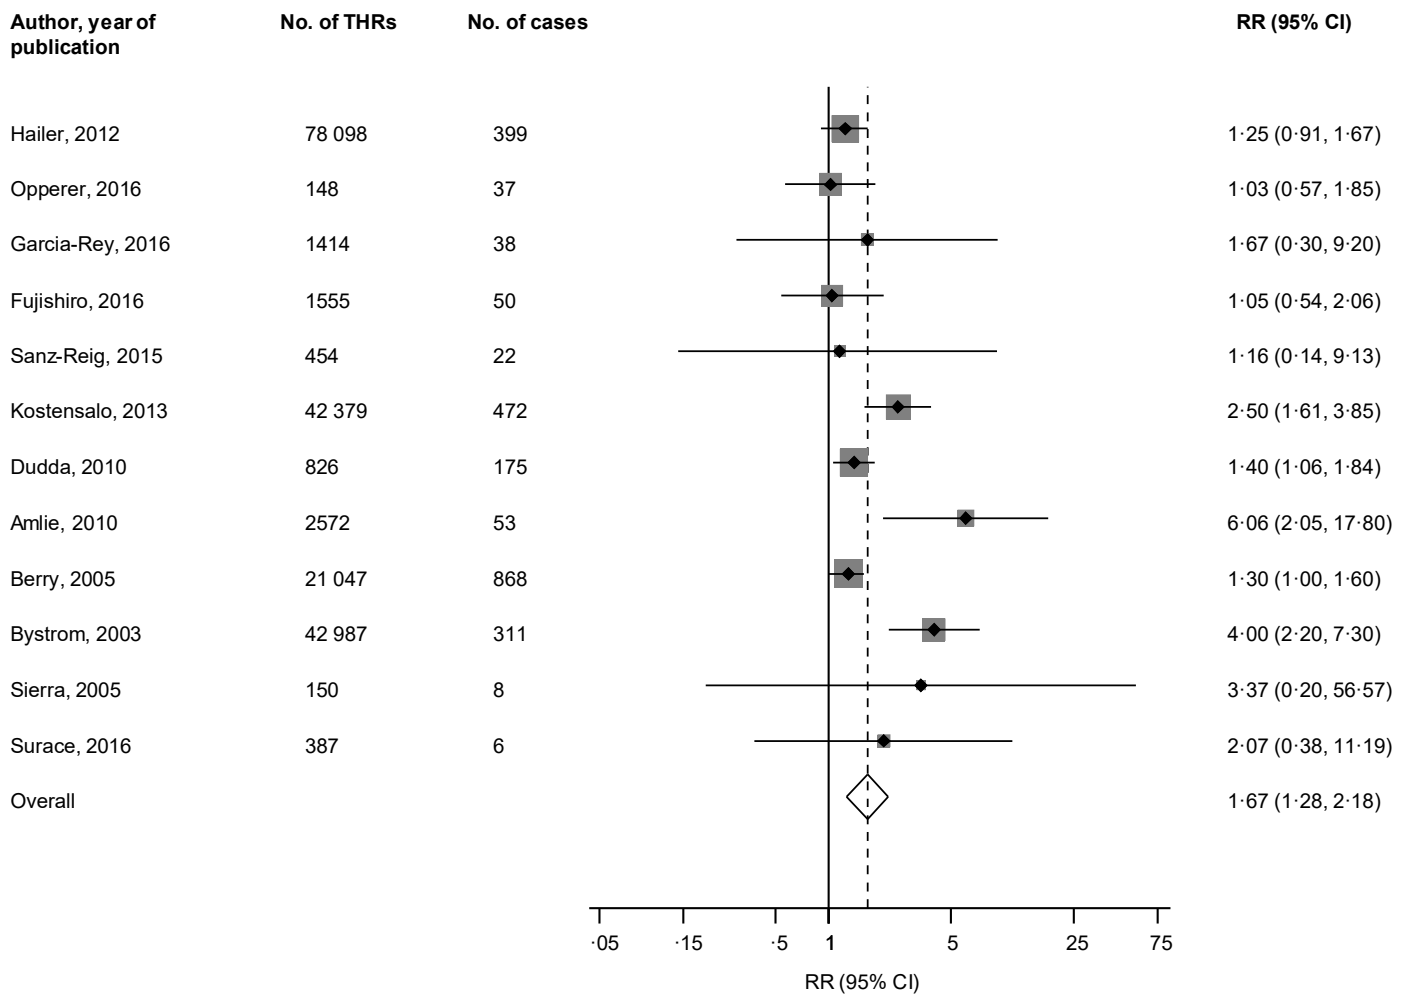

CI, confidence interval (bars); RR, relative risk; THR, total hip replacement

**Appendix 27.** Risk of dislocation comparing femoral head diameter 28mm versus 32mm, grouped according to study level characteristics

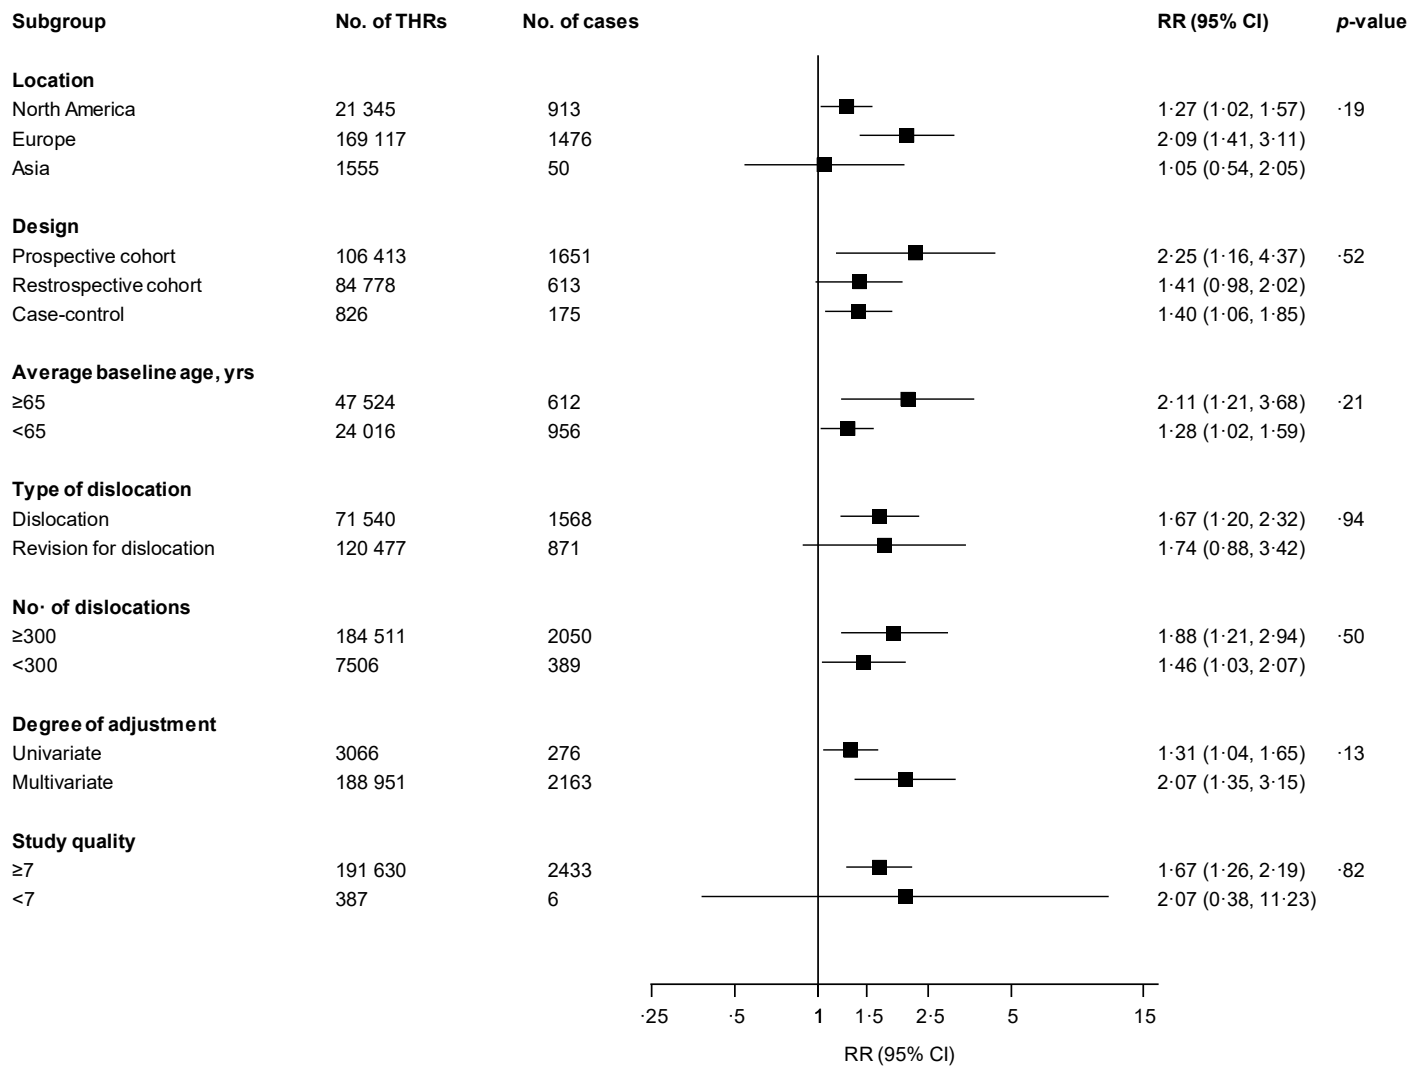

CI, confidence interval (bars); RR, relative risk; *p*-values are for meta-regression

**Appendix 28.** Summary associations of hospital-related factors and risk of dislocation

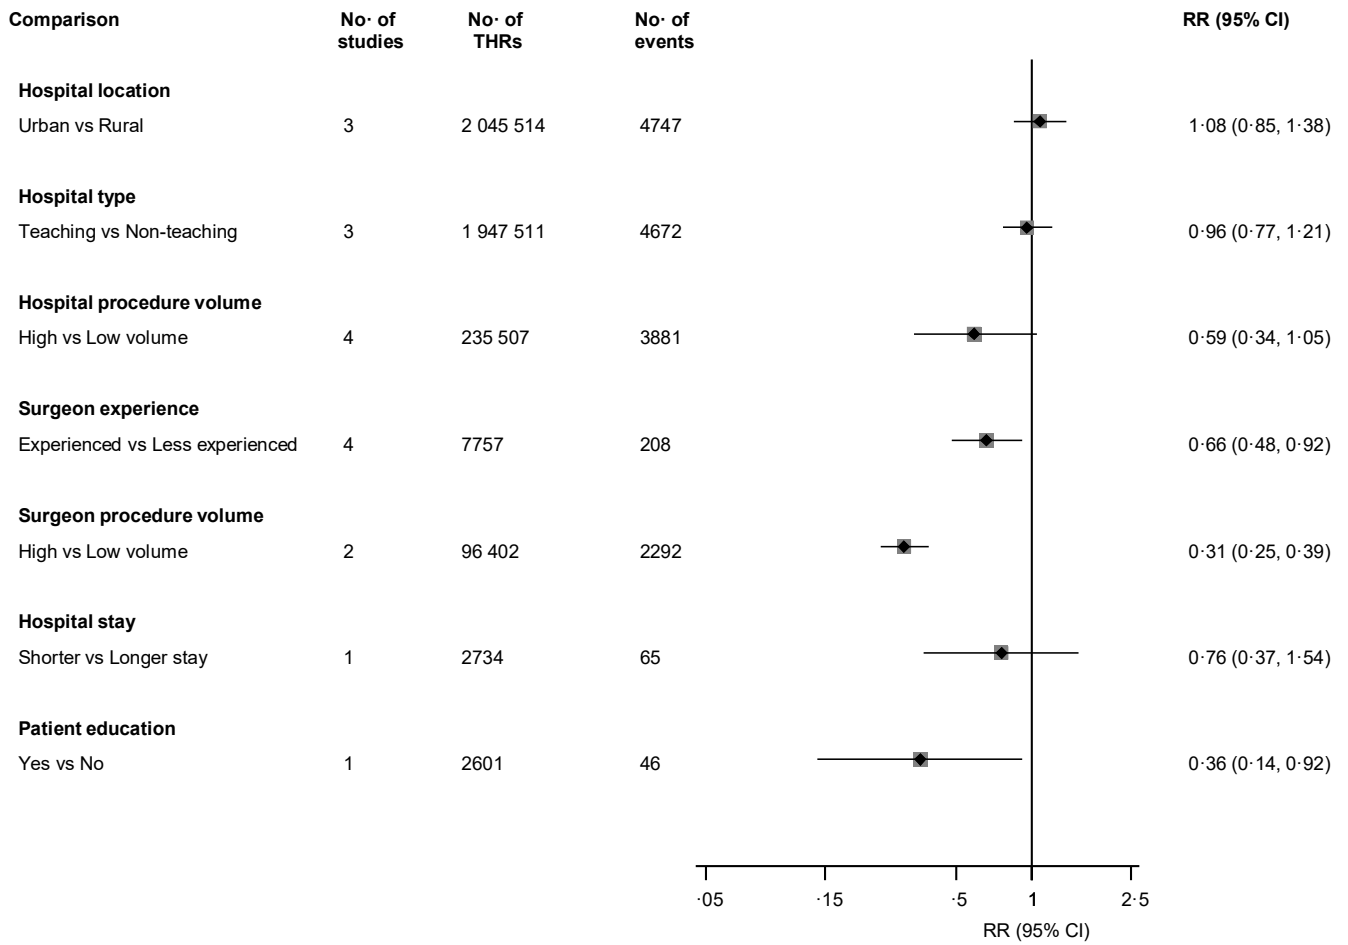

CI, confidence interval (bars); RR, relative risk; THR, total hip replacement

## Appendix 29. Hospital-related factors and risk of dislocation

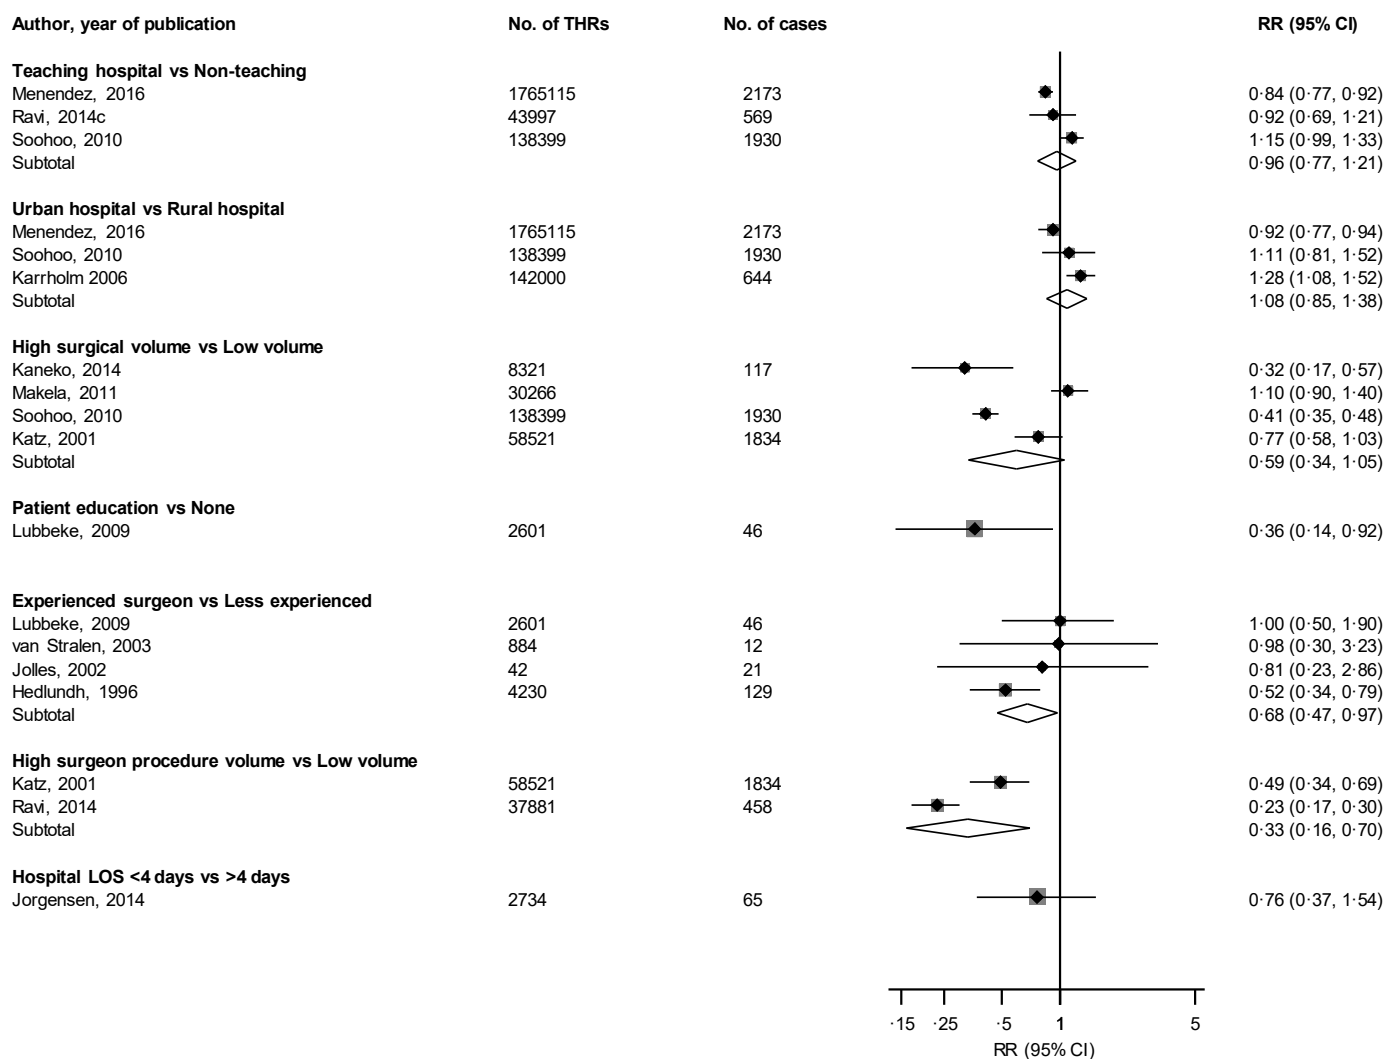

CI, confidence interval (bars); Hb, haemoglobin; LOS, length of stay; RR, relative risk; THR, total hip replacement

**Appendix 30.** Assessment of small study effects by funnel plots and Egger's regression symmetry tests

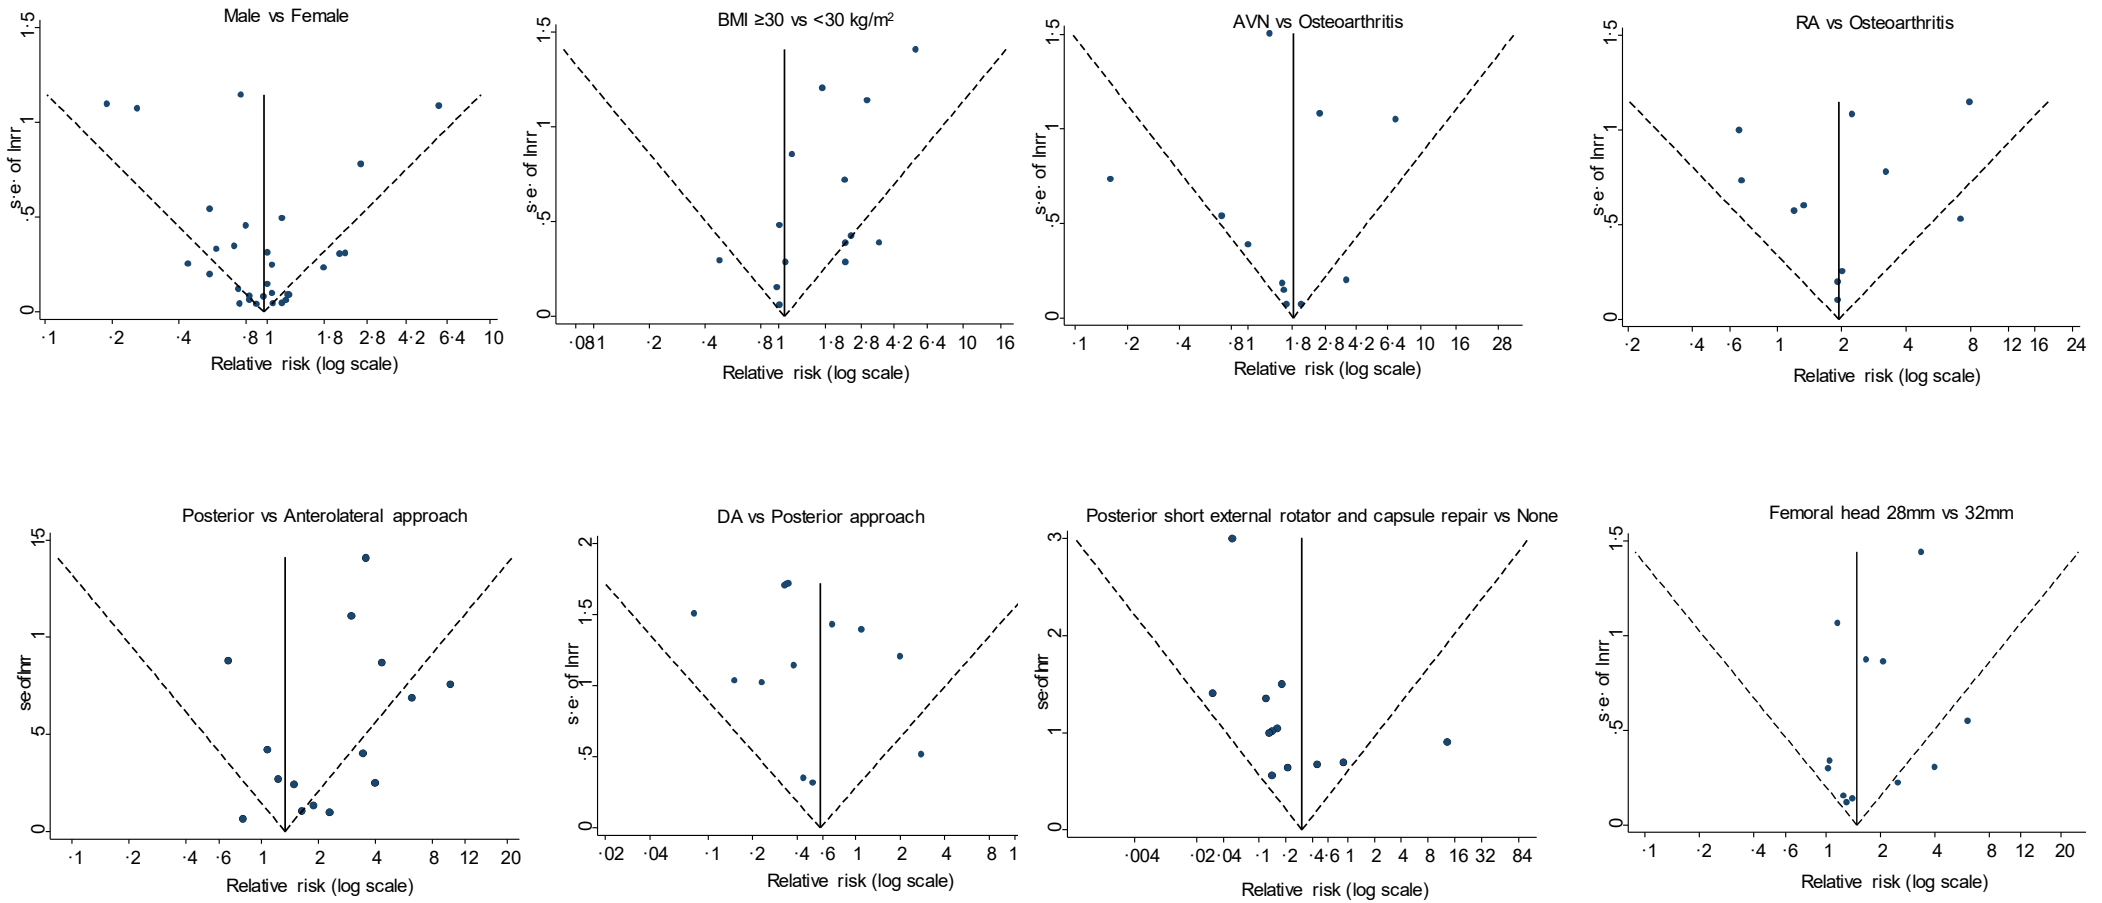

The dotted lines show 95% confidence intervals around the overall summary estimate calculated using a fixed effect model; *P*-values for bias calculated using Egger's test were 0.88; 0.06; 0.50; 0.87; 0.08; 0.63; 0.57; and 0.22 for male versus female; BMI  $\geq 30$  versus  $< 30$ ; avascular necrosis versus osteoarthritis; rheumatoid arthritis versus osteoarthritis; posterior versus anterolateral approach; direct anterior versus posterior approach; posterior short external rotator and capsule repair versus none; and femoral head diameter 28mm versus 32mm; AVN, avascular necrosis; BMI, body mass index; DA, direct anterior, RA, rheumatoid arthritis
